1 **Temporal differentiation of bovine airway epithelial**  
2 **cells grown at an air-liquid interface**

3 **Daniel Cozens<sup>1</sup>, Erin Sutherland<sup>1</sup>, Francesco Marchesi<sup>2</sup>, Geraldine Taylor<sup>3</sup>, Catherine**  
4 **Berry<sup>4</sup> and Robert Davies<sup>1\*</sup>.**

5

6 <sup>1</sup> *Institute of Infection, Immunity and Inflammation, College of Medical, Veterinary and Life*  
7 *Sciences, University of Glasgow, Glasgow, UK*

8 <sup>2</sup> *School of Veterinary Medicine, University of Glasgow, Glasgow, UK*

9 <sup>3</sup> *The Pirbright Institute, Pirbright, Surrey, UK*

10 <sup>4</sup> *Institute of Molecular, Cell and Systems Biology, College of Medical, Veterinary and Life*  
11 *Sciences, University of Glasgow, Glasgow, UK*

12

13

14 \*Corresponding Author

15 Email: [robert.davies@glasgow.ac.uk](mailto:robert.davies@glasgow.ac.uk)

16

17 **Abstract**

18 The respiratory epithelium is exposed to assault by toxins and pathogens through the process  
19 of inhalation, which has numerous implications on both human and animal health. As such,  
20 there is a need to develop and characterise an *in vitro* model of the airway epithelium to study  
21 respiratory pathologies during infection or toxicology experiments. This has been achieved  
22 by growing airway epithelial cells at an air-liquid interface (ALI). Characterisation of ALI  
23 models are not well-defined for airway epithelial cells derived from non-human species. In  
24 this study we have fully characterised a bovine airway epithelial cell models (AECM) grown  
25 at an ALI in relation to *ex vivo* tissue. The morphology of the model was monitored at three  
26 day intervals, to identify the time-period at which the culture was optimally differentiated.  
27 The model was shown to be fully-differentiated by day 21 post-ALI. The culture formed a  
28 stereotypical pseudostratified, columnar epithelium containing the major cell types of the  
29 bronchial epithelium (ciliated-, goblet- and basal cells). Once fully differentiated the bovine  
30 AECM displayed both barrier function, through the formation of tight-junctions, and active  
31 mucociliary clearance, important properties of the mucosal barrier. The bovine bronchial  
32 epithelial cells remained stable for three weeks, with no evidence of deterioration or  
33 dedifferentiation. The window in which the model displayed full differentiation was  
34 determined to be between day 21-42 post-ALI. Through comparison with *ex vivo* tissue  
35 derived from donor animals, our bovine AECM was shown to be highly representative of the  
36 *in vivo* bovine bronchial epithelium and can be utilised in the study of respiratory  
37 pathologies.

## 38 **Introduction**

39 Through the process of inhalation, the airway epithelium is exposure to a wide variety of  
40 substances. These inhaled particles can potentially be harmful following contact, including  
41 pathogenic organisms and toxins [1-3]. As such, the respiratory tract is subject to diverse  
42 pathologies which can have numerous implications on both human and animal health. The  
43 airway epithelium is one of the first lines of defence, acting as a physiochemical barrier  
44 against inhaled toxins, pollutants and invading pathogens [2, 4]. The epithelia has developed  
45 numerous adaptations, including mucociliary clearance [5-7] and intercellular junctions [1, 8]  
46 which work in conjunction to remove inhaled insults, in order to maintain homeostasis [9].  
47 These mechanisms can be disrupted following exposure by inhaled pathogens, which can  
48 cause extensive damage to the epithelia and allow transmigration to deeper tissue [10, 11].  
49 The bronchial epithelium however is capable of repairing and remodelling itself following  
50 damage through proliferation and differentiation of progenitor cells, maintaining the integrity  
51 of the respiratory tract [12, 13]. Due to the impact of respiratory pathologies, there is a need  
52 to model the airway epithelium, including the associated defence mechanisms and the  
53 differentiation of epithelial cells during repair. This has traditionally been achieved through  
54 the use of animal models. Animal research is associated with high experimental cost and  
55 time requirements, as well as carrying ethical implications, due to the contradictions to the  
56 Three R's principles [14]. As such, there is a need for physiologically-relevant *in vitro*  
57 models of the bronchial epithelium which can be used as alternatives to animal models.

58 Application of an air-liquid interface (ALI) to produce *in vitro* airway epithelial cell models  
59 (AECMs) is widely used in both toxicology [15-17] and infectious disease research [18-21].  
60 These models trigger the differentiation of airway epithelial cells using exposure to the  
61 atmosphere [22], as well as through the addition of growth factors such as epidermal growth  
62 factor [23-25] and retinoic acid [23, 26, 27]. This results in a mixed-cell population

63 consisting of ciliated cells, mucus-secreting goblet cells and progenitor basal cells present as  
64 a pseudostratified epithelium [28]. The differentiation process does not occur if primary cells  
65 are grown under submerged conditions [29], and as such submerged cultures fail to replicate  
66 the *in vivo* tissue complexity [30]. The transition of epithelial cells into a differentiated  
67 airway epithelium is complex process which occurs through a number of developmental  
68 stages, involving cell proliferation and differentiation [12, 31, 32]. Following differentiation,  
69 ALI-grown cultures possess both mucociliary clearance and transepithelial resistance [23, 32]  
70 which are critical for assessing their response to infection or toxic insult [33]. Differentiated  
71 AECM also enables infections to be studied in a mixed-cell population, allowing the  
72 identification of cell type targeting during infection [18, 31, 34, 35]. Due to these properties  
73 AECM provide excellent tools for researching respiratory pathologies.

74 The use of bovine airway epithelial cells to form differentiated AECM has been established  
75 previously. Bovine AECMs have been used to study economically-important infections in  
76 cattle, including bovine respiratory viruses [34, 36] and the bacteria *Mycobacterium*  
77 *tuberculosis* and *Mycobacterium bovis* [37]. Bovine AECMs have also been used to  
78 investigate the basic biology of the mammalian respiratory tract, including aspects of  
79 oxidative stress [38], ion transport and signalling [39, 40] and the air surface liquid [41]. The  
80 benefit of using cells isolated from cattle as opposed to human tissue is their ready  
81 availability and low cost [39]. As such, AECM derived from bovine airway epithelial cells  
82 may represent a more accessible alternative to human cells. This may be particularly relevant  
83 for infectious diseases in which identical or closely-related pathogens infect both humans and  
84 cattle. For example, *M. tuberculosis* is known to be carried by both humans and cattle [42].  
85 Similarly, human respiratory syncytial virus is closely related to bovine respiratory syncytial  
86 virus, and results in similar associated pathologies [43].

87 For pathologies to be accurately assessed following exposure to infection or toxins, ALI  
88 models need to be fully characterised. Similarly, the transition of the model from  
89 undifferentiated cells to a fully differentiated epithelium must be well defined in order to  
90 determine the ability of the model to repair following damage. Although this has been  
91 achieved for human [28, 32] and ovine AECMs [44], bovine AECMs have yet to be well-  
92 defined. We aimed to fully characterise the differentiation of BBECs grown at an air-liquid  
93 interface. This model has previously been optimised in our group in order to establish a high  
94 degree of differentiation using a serum-free medium. Our bovine AECM was extensively  
95 studied at three day intervals, from three days prior to the establishment of an ALI, during  
96 which the cells were under submerged conditions, until day 42 post-ALI. Key markers of  
97 epithelial cell differentiation, including morphology, the formation of tight-junctions and the  
98 presence of ciliated and goblet cells were assessed at each time-point. De-differentiation and  
99 deterioration of the culture was also monitored, allowing us to define the optimum window at  
100 which the model was suitable used for infection or toxicology studies.

## 101 **Materials and Methods**

### 102 **Isolation of bovine bronchial epithelial cells**

103 Bronchial epithelial cells were obtained from cattle aged 18-36 months, as described in  
104 Cozens et al. The breeds of the animals used were Limousin (animal 1) and Simmental  
105 (animal 2 and 3). The lungs of cattle were collected post-slaughter at Sandyford Abattoir  
106 Ltd., UK. The bronchial tract was swabbed to ensure there was no pre-existing  
107 bacterial/fungal infection. Briefly, the main and lobar bronchi were isolated from the lungs  
108 and the surrounding tissue was carefully dissected away. Small ( $\sim 1 \text{ cm}^2$ ) samples from each  
109 bronchus was collected and fixed in 2% (w/v) formaldehyde overnight for histological  
110 analysis and electron microscopy. The bronchi were sectioned and cut vertically to expose

111 the epithelium, yielding rectangular tissue sections 6-7 cm in length. Epithelial cells were  
112 isolated from the bronchi by incubation overnight at 4°C in ‘digestion medium’ composed of  
113 Dulbecco’s modified Eagle’s medium (DMEM) and Ham’s nutrient F-12 (1:1) containing 1  
114 mg/ml dithioreitol, 10 µg/ml DNAase and 1 mg/ml Protease XIV from *Streptomyces griseus*,  
115 supplemented with penicillin (100 U/ml), streptomycin (100 µg/ml) and amphotericin (2.5  
116 µg/ml) (Sigma-Aldrich). All subsequent media used in this investigation were also  
117 supplemented with penicillin-streptomycin and amphotericin. The digestion was halted with  
118 the addition of foetal calf serum to give a final concentration of 10% (v/v). Loosely-attached  
119 epithelial cells were removed from the submucosa by rigorous rinsing of the luminal surface.  
120 The cell suspension was passed through a 70 µm cell strainer to remove tissue and was  
121 subsequently centrifuged and resuspended in ‘submerged growth medium’ (SGM), comprised  
122 of DMEM/Ham’s F-12 (1:1) supplemented with 10% (v/v) foetal calf serum. The viability of  
123 the cell suspension was assessed using the Trypan Blue exclusion assess, and was typically  
124 90-95% viable. Cells were seeded into T75 tissue culture flasks ( $5 \times 10^6$  cells/flask) for  
125 expansion. The flasks were incubated at 37°C in 5% CO<sub>2</sub> and 14% O<sub>2</sub>, in a humidified  
126 atmosphere.

### 127 **Culture of bovine bronchial epithelial cells**

128 The BBECs were harvested at 80-90% confluency (~4 days). Cells were detached from the  
129 flasks using 0.25% trypsin-EDTA solution, centrifuged and resuspended in SGM at a density  
130 of  $5 \times 10^5$  cells/ml. The BBECs were seeded into the apical chamber of tissue culture inserts  
131 (Thincerts, Greiner #66540, polyethylene terephthalate membrane, 0.4 µm pore diameter,  $1 \times$   
132  $10^8$  pore per cm<sup>2</sup>) at a cell density of  $2.5 \times 10^5$  cells per insert, and 1 ml of SGM was added to  
133 the basolateral compartment. Cultures were incubated at 37 °C, 5% CO<sub>2</sub>, 14% O<sub>2</sub>, in a  
134 humidified atmosphere. The BBECs were allowed to attach to the insert overnight. The  
135 apical medium of the culture was subsequently removed and the apical surface washed with

136 0.5 ml PBS. The SGM media in the apical and basolateral compartments was then replaced.  
137 This process was repeated every 2 – 3 days. The trans-epithelial electrical resistance (TEER)  
138 of the cultures were monitored on a daily basis using an EVOM2 epithelial voltohmmeter  
139 (World Precision Instruments, UK), as per the manufacturer's instruction. The SGM was  
140 replaced with a mixture of SGM and 'air-liquid interface medium' (ALIM) (1:1) when the  
141 TEER reached above  $200 \Omega/\text{cm}^2$  (~2 days post-seeding). The ALIM was composed of  
142 DMEM and airway epithelial cell growth medium (Promocell) (1:1) supplemented with 10  
143 ng/ml epidermal growth factor, 100 nM retinoic acid, 6.7 ng/ml triiodothyronine, 5  $\mu\text{g}/\text{ml}$   
144 insulin, 4  $\mu\text{l}/\text{ml}$  bovine pituitary extract, 0.5  $\mu\text{g}/\text{ml}$  hydrocortisone, 0.5  $\mu\text{g}/\text{ml}$  epinephrine and  
145 10  $\mu\text{g}/\text{ml}$  transferrin (all Promocell). When the TEER value was above  $500 \Omega \text{ cm}^2$  (~6 days  
146 post-seeding), an ALI was generated by removing the medium in the apical compartment,  
147 thereby exposing the epithelial cells to the atmosphere (day 0 post-ALI). Following the  
148 formation of the ALI, the cells were fed exclusively from the basal compartment with ALIM.  
149 Apical washing, basal feeding and TEER measurements were performed every 2 - 3 days  
150 until day 42 post-ALI.

## 151 **Histology**

152 Samples of BBEC cultures were taken at three day intervals, from three days prior to the  
153 establishment of an ALI (day -3) until day 42 post-ALI. At each time-point, samples were  
154 fixed by the addition of 4% (w/v) paraformaldehyde to the apical surface for 15 min at room  
155 temperature. Fixed samples were rinsed and stored in PBS at  $4^\circ\text{C}$  until the completion of the  
156 time-course. A series of increasing ethanol concentrations was used to dehydrate the  
157 samples, before being cleared with xylene, infiltrated with paraffin wax and embedded in  
158 wax blocks. Sections of  $2.5 \mu\text{m}$  thickness were cut in transverse sections using a  
159 Thermoshandon Finesse ME+ microtome. Samples were subsequently haematoxylin and  
160 eosin (H&E) stained using standard histological techniques.

161 **Histological analysis**

162 Histological sections stained with H&E were prepared from three individual cultures derived  
163 from each of three animals. For each section, five randomised x400 fields of view were  
164 imaged across the stand. ImageJ was used to quantify the thickness of the cell layer and the  
165 number of cell layers forming the epithelium at three vertical sections within each field of  
166 view. In addition, the number of ciliated cells (cells with visible cilia present), epithelial gaps  
167 and pyknotic cells were quantified within each field of view.

168 **Chromogenic Immunohistochemistry**

169 For the identification of basal cells, chromogenic immunohistochemistry was used. Samples  
170 were processed and 2.5 µm-thick sections obtained as described. A Menarini Access  
171 Retrieval Unit was used to perform heat-induced epitope retrieval. Staining was  
172 subsequently performed using a Dako Autostainer. Endogenous peroxidase was blocked  
173 using 0.3% (v/v) H<sub>2</sub>O<sub>2</sub> in PBS. Basal cells were identified by incubation for 30 min with a  
174 1:30 dilution of mouse anti-p63 antibody (Abcam; #ab735), application of an anti-mouse  
175 HRP-labelled polymer and visualization with a REAL EnVision Peroxidase/DAB+ Detection  
176 System (Dako; #K3468). Samples were counterstained with Gill's haematoxylin, before  
177 dehydration, clearing and mounting in synthetic resin. Sections were viewed using a Leica  
178 DM2000 microscope (Leica, Germany).

179 **Fluorescent Immunohistochemistry**

180 Samples were processed and 2.5 µm-thick sections obtained as described. Samples were  
181 deparaffinised using two 5 min washes in 100% xylene before rehydration through a series of  
182 decreasing ethanol concentrations. Samples were subject to heat-induced epitope retrieval by  
183 immersion in sodium citrate buffer (10 mM sodium citrate, 0.05% [v/v] Tween-20, pH 6) at  
184 100 °C for 20 min. Samples were blocked by incubation in blocking buffer for 1 h at room  
185 temperature (PBS containing 0.05% [v/v] Tween-20, 10% [v/v] goat serum and 1% [w/v]



186 bovine serum albumin). The cultures were incubated with primary antibodies diluted in  
187 blocking buffer for 1 h at room temperature. Samples were washed three times in PBS  
188 containing 0.05% (v/v) Tween-20 for 2 min following each incubation. The primary-  
189 secondary antibody pairings were applied as follows. Primary antibodies were used at a  
190 dilution of 1:200. Secondary antibodies were used at a dilution of 1:400. Ciliated cells were  
191 detected with rabbit anti- $\beta$ -tubulin antibody (Abcam; #ab6046) and visualised using goat  
192 anti-rabbit-Alexa Fluor 647 (Thermo Fisher; #A-21244); basal cells were visualised with  
193 mouse anti-p63 antibody (Abcam, #ab735) and visualised with goat anti-mouse-Alexa Fluor  
194 568 (Thermo Fisher; #A-11031); goblet cells were detected with fluorescein-labelled jacalin  
195 (Vector Laboratories; FL-1151) [45]. Following each primary-secondary pairing blocking  
196 was repeated. Nuclei were stained with 300 nM 4',6 diamidino-2-phenylindole (DAPI) for 10  
197 min. Samples were subsequently washed and mounted in Vectashield mounting medium  
198 (Vector Laboratories). Samples were observed on a Leica DMI8 microscope. Analysis of  
199 captured images was performed using ImageJ software.

## 200 **Immunofluorescence microscopy**

201 For immunofluorescence, paraformaldehyde-fixed samples were permeabilised using  
202 permabilization buffer (PBS with 0.5% [v/v] Triton X-100, 100 ml/ml sucrose, 4.8 mg/ml  
203 HEPES, 2.9 mg/ml NaCl and 600  $\mu$ g/ml  $MgCl_2$ , pH 7.2) for 10 min at room temperature.  
204 Samples were blocked by incubation with blocking buffer for 1 h. Ciliated- and goblet-cells  
205 were detected using the methods described for fluorescent immunohistochemistry. Tight-  
206 junction formation was detected with mouse anti-ZO-1 antibody (1:50 dilution; Thermo  
207 Fisher; #33910) and visualised with goat anti-mouse-Alexa Fluor 488 (1:400 dilution;  
208 Thermo Fisher; #A-11001). Antibodies utilised were diluted in blocking buffer. The cultures  
209 were incubated with primary antibodies diluted in blocking buffer for 1 h at room  
210 temperature. Samples were washed three times in PBS containing 0.05% (v/v) Tween-20 for

211 2 min following each incubation. F-actin was visualised by incubation with a 1:40 dilution of  
212 rhodamine phalloidin (Thermo Fisher; #R415) for 20 min. Nuclei were stained with 300 nM  
213 DAPI for 10 min. Following staining, membranes were cut from their insert and mounted in  
214 Vectashield mounting medium (Vector Laboratories). Samples were observed on a Leica  
215 DMI8 microscope. Analysis of captured images was performed using ImageJ software.

#### 216 **Quantification of ciliogenesis**

217 To quantify the degree of cilia formation on the apical surface, five randomized fields of view  
218 of each  $\beta$ -tubulin-stained insert were acquired via a 20x objective. Coverage of cilia was  
219 quantified for each image using ImageJ. A fluorescence intensity threshold was applied to  
220 select ciliated regions. These regions were measured and expressed as a percentage of the  
221 total area.

#### 222 **Scanning electron microscopy**

223 Cultures were fixed in 1.5% (v/v) glutaraldehyde diluted in 0.1 M sodium cacodylate buffer  
224 for 1 h at 4 °C. The apical and basal compartment was subsequently rinsed three times and  
225 stored in 0.1 M sodium cacodylate buffer at 4 °C until completion of the time-course. To  
226 post-fix samples, 0.5 ml of 1% (w/v) osmium tetroxide was added to the apical compartment  
227 for 1 h at room temperature and washed three times for 10 min with distilled water. Samples  
228 were stained with 0.5% (w/v) uranyl acetate for 1 h in the dark. Dehydration was performed  
229 using a series of increasing ethanol concentrations. Hexamethyldisilazane was used for the  
230 final drying stage before being placed in a desiccator overnight. Membranes were cut from  
231 the inserts, mounted onto aluminium SEM stubs and gold sputter-coated. Samples were  
232 analysed on a Jeol 6400 scanning electron microscope at 10 kV.

## 233 **Transmission electron microscopy**

234 For transmission electron microscopy (TEM), samples were fixed and processed as described  
235 for scanning electron microscopy until dehydration in absolute ethanol. Samples were  
236 subsequently washed in propylene oxide three times for 10 min before being immersed in 1:1  
237 dilution of propylene oxide and Aradite/ Epon 812 resin overnight. The samples were washed  
238 in three changes of resin and fresh embedded in resin within rubber models, which was  
239 allowed to polymerise at 60 °C for 48 h. Resin-embedded samples were cut to ultrathin  
240 sections of 50 nm thickness using a Leica Ultracut UCT and a DiATOME diamond knife.  
241 Sections were collected on 100 mesh Formvar-coated copper grids. Samples were finally  
242 contrast stained with 2% (w/v) methanolic uranyl acetate for 5 min and Reynolds lead citrate  
243 for 5 min. Cultures were analysed on a FEI Tecnai transmission electron microscope at 200  
244 kV. Images were captured with a Gatan Multiscan 794 camera.

## 245 **Results**

### 246 **Epithelial morphology**

247 Bovine bronchial epithelial cells were cultured at an ALI over 42 days. Morphological  
248 assessment of the epithelium was conducted on histological sections taken from samples  
249 fixed at three day intervals, ranging from three days prior to establishment of the ALI (day -3  
250 pre-ALI) until day 42 post-ALI. The general morphology of the epithelial cell layer was  
251 assessed using an H&E stain (Fig 1A; S1 Fig). During submerged growth (day -3 and 0),  
252 BBECs formed squamous monolayers which exhibited no evidence of polarisation (Fig 1A  
253 [i]). Establishing an ALI caused the cultures to transition to a differentiated pseudostratified  
254 epithelium over time, reminiscent of *ex vivo* tissue (S1 Fig). Between day 0-21 post-ALI the  
255 cell layer gradually thickened to approximately 30-40 µm thickness. Conversely, there was  
256 no subsequent increase in the thickness of the cultures from day 21 onwards (Fig 1C). The

257 number of cells within the epithelium also increased following the establishment of the ALI  
258 (Fig 1D). The BBECs transitioned from a squamous monolayer to becoming approximately  
259 two cells in depth and possessing a cuboidal morphology between day 3-12 post-ALI (Fig 1A  
260 [ii]). By day 15, until completion of the time-course, the cultures were approximately three  
261 cells in depth. This change coincided with the epithelium becoming increasingly columnar  
262 and pseudostratified (Fig 1A [iii & iv]), replicating *ex vivo* tissue (Fig 2A [i]). At all time-  
263 points from day 12 to day 42, a single layer of p63 positive basal cells was observed. This  
264 mimicked the distribution of basal cells in *ex vivo* samples where a single continuous layer  
265 was present attached to the basement membrane (Fig 1B; S2 Fig).

266 The BBEC cultures were assessed for cellular and tissue deterioration following extended  
267 culturing at an ALI. There was a time-dependent increase in both the number of pyknotic  
268 cells (S3A [i] & B Fig) and epithelial gaps (S3A [ii] & C Fig) present per field of view.  
269 However this trend was determined to be due to an overall increase in the number of cells  
270 present in the epithelium over time. Once the cell number in the epithelium had reached a  
271 peak at day 21 post-ALI, there was no subsequent significant increase in either the number of  
272 epithelial gaps or pyknotic cells (Ordinary one-way ANOVA). This finding suggested the  
273 BBECs were stable for at least six weeks of culturing at an ALI.

274 A comparison was made of histological sections taken from BBECs cultured for 21 days  
275 post-ALI and the *ex vivo* bovine bronchial epithelium of the donor animal (Fig 2). Both  
276 sections display a pseudostratified columnar epithelial morphology, stereotypical of the  
277 airway epithelium (Fig 2A). The BBECs grown at an ALI were consistently thinner in  
278 comparison to the *ex vivo* epithelium. Immunohistochemistry was performed to detect the  
279 distribution of the epithelial cell types of the lower respiratory tract (Fig 2B). Both *ex vivo*  
280 tissue and the BBECs grown at an ALI displayed all major epithelial cell types with  
281 comparable morphology. B-tubulin-labelled ciliated cells and jacalin-labelled mucus

282 producing goblet cells were present at the apical aspect of the epithelium; however the  
283 density of ciliated cells was lower in the cultured BBECs compared to *ex vivo* samples. The  
284 differentiation of ciliated and mucus producing epithelial cells will be discussed in greater  
285 detail below.

### 286 **Barrier function**

287 The barrier function of the BBECs was assessed at three day intervals during culturing (Fig  
288 3). Using junctional protein ZO-1 as a marker, tight-junctions were found to be present in the  
289 BBEC cultures at all time-points, both during submerged and ALI growth (Fig 3A and S3).  
290 ZO-1 was shown to be localised to the sub-apical cell-to-cell borders, indicative of intact  
291 tight-junction. During submerged growth (day -3 and 0) the cells were large and squamous,  
292 but once an ALI was established the cells adopted a more cobblestone appearance,  
293 reminiscent of differentiated epithelia, and as such the number of tight-junctions present per  
294 field of view increases (Fig 3A). There was no detectable decrease in ZO-1 at later time-  
295 points. Transmission electron microscopy of day 42 post-ALI cultures and *ex vivo* further  
296 identified adherens junctions and desmosomes (Fig 3B), confirming the presence of  
297 junctional complexes.

298 The TEER of the BBECs was measured to confirm the function of tight-junctions in the  
299 epithelium (Fig 3C). The BBECs reached confluency after two days of submerged growth  
300 post-seeding, resulting in the presence of a TEER. The TEER peaked after five days of  
301 submerged growth in all replicates; however the value at which the TEER peaked varied  
302 considerably between replicates. At this time-point, barrier function was present and an ALI  
303 could be established. The TEER gradually declined thereafter during the ALI phase, until  
304 day 9 post-ALI, by which TEER stabilised at  $\sim 150\text{-}300 \Omega \times \text{cm}^2$  in all replicates. The  
305 reduction in TEER did not coincide with variation in tight-junction staining (Fig 3A), and  
306 barrier function was intact throughout the 42 days of culturing at an ALI.

307 **Cilia formation**

308 The temporal development of cilia on the apical surface of the AECM was assessed during  
309 culturing (Fig 4). Cilia were identified using  $\beta$ -tubulin as a marker (Fig 4A; S4 Fig),  
310 detection using SEM (Fig 4B; S5 Fig) and in histological sections (Fig 4C; S1 Fig).  
311 Furthermore, the extent of cilia formation was quantified in histological samples (Fig 4D) and  
312 immunostained cultures (Fig 4E). During submerged growth,  $\beta$ -tubulin could be detected in  
313 BBECs, however the staining pattern was cytoplasmic, forming cytoskeletal microtubules,  
314 and was not indicative of cilia formation (Fig 4A [i]). This was confirmed by SEM (Fig 4B  
315 [i]). Cilia formation was evident as early as day 6 post-ALI; ciliary staining was distinguished  
316 from cytoskeletal  $\beta$ -tubulin due to the intensity of the signal and localisation at the apical  
317 aspect (Fig S5). As cells were cultured over time, cilia formation at the apical aspect became  
318 increasingly abundant. Bright-field microscopy of BBECs grown at an ALI for 21 days on  
319 low-pore density inserts showed that cilia are capable of beating microspheres in a  
320 coordinated fashion (data not shown), confirming the cilia are functional. The degree of cilia  
321 formation of the BBECs reached a maximum by approximately day 21 post-ALI, and there is  
322 no subsequent significant increase in the number of ciliated cells between day 21-42 post-  
323 ALI (Figs 4D and 4E; Ordinary one-way ANOVA). During this period the majority of the  
324 apical aspect was composed of ciliated cells (Fig 4A [iii & iv]). The time by which maximal  
325 cilia formation was achieved varied between cultures derived from individual animals,  
326 however the overall temporal pattern of ciliary differentiation was similar (Fig 4D and 4E),  
327 and variation was not statistically significant (Ordinary one-way ANOVA).

328 Cilia formation was compared between day 21 post-ALI BBEC cultures and *ex vivo* tissue  
329 (Fig 5). Both samples displayed a highly ciliated apical surface. However the overall degree  
330 of coverage was slightly lower in BBEC cultures grown at an ALI in comparison to *ex vivo*  
331 tissue (Fig 5A). The ultrastructure of the cilia produced by the BBEC cultures was highly

332 analogous to the source tissue (Fig 5B and 5C). The configuration of both the cilium basal  
333 body (Fig 5B) and the ciliary 9 + 2 axoneme (Fig 5C) was consistent; there was no indication  
334 of malformation in cilia produced by BBEC.

### 335 **Mucus Production**

336 The development of mucus-producing goblet cells was also assessed in ALI-grown BBECs  
337 (Fig 6). Mucus production was identified using jacalin, a lectin which binds mucin Muc5AC  
338 on goblet cells [28] (Fig 6A; S7 Fig). Muc5AC-positive cells were present in BBEC cultures,  
339 both at an ALI and whilst cells were submerged. There was no observable change in the  
340 number of Muc5AC-positive cells over time. Scanning electron microscopy further  
341 confirmed the presence of mucus in the BBEC models. Excreted mucus could be observed in  
342 cultures from day 15 post-ALI, either as globules coating cilia within the model (Fig 6C [i]),  
343 as well as webs coating the apical surface (Fig 6C [ii]). Goblet cells actively extruding  
344 mucus could also be observed (Fig 6C [iii]). This suggests the mucosal phenotype of the  
345 BBECs was not dependent on full differentiation of the model, however active extrusion of  
346 mucus could only be confirmed from day 15 post-ALI onwards.

### 347 **Ultrastructure**

348 Analysis of the ultrastructure of the bovine AECM was conducted at each three day interval  
349 using SEM. During submerged growth, the cells appeared squamous (Fig 7A) and devoid of  
350 markers of differentiation such as cilia. Microvilli and microplicae could be observed on the  
351 cellular surface (Fig 7B). Once an ALI was introduced, cells appear to form a more  
352 cobblestone morphology. This was accompanied by the microvilli becoming denser and  
353 more pronounced (Fig 7C). Cilia were visible by day 6 post-ALI in isolated cells (Fig 7D).  
354 Ciliated cells became more numerous as the model progresses through the differentiation  
355 period (day 6-21 post-ALI) (Fig 7E). There was no observable difference in the topography  
356 of the model between days 21-42 post ALI, with little sign of degradation or dedifferentiation

357 in the cell culture present visually after 6 weeks of culturing (Fig 7F). Cross sections of the  
358 cell layer at day 18 post-ALI exhibited the stereotypical pseudostratified morphology (Fig  
359 7G). In differentiated BBEC cultures, the majority of cells at the apical aspect were ciliated  
360 (Fig 5A [i]), with microvilli observed around the base of the cilia (Fig 7I). Highly  
361 microvillous cells were also present, which may be non-excreting goblet cells (Fig 7H) [46].  
362 Globules of mucus located nearby and extruding mucus could be observed in the model,  
363 supporting this assumption (Fig 6C).

## 364 **Discussion**

365 The aim of the present study was to characterise the differentiation over time of an AECM  
366 derived from BBECs. The model was assessed over a 42-day period to allow the  
367 identification a window at which the culture was at an optimum differentiation. This has  
368 important implications for the use of the model in respiratory infection experiments. The  
369 degree of differentiation of airway epithelial cells can considerably alter the ability of both  
370 bacterial and viral pathogens to colonise [25, 31, 47]. Differentiation state of an AECM can  
371 also impact the response of a model during both infectious and toxicology studies [48, 49]. It  
372 was as such vital to pinpoint the window at which our bovine AECM is fully differentiated.  
373 Previous studies have placed this window between day 24-33 for human AECMs [32] and  
374 day 24-42 for ovine AECMs [44]. We have carried out comprehensive analysis of the  
375 differentiation of our model over an extended time-period and determine the window in  
376 which the bovine AECM were fully differentiated as between day 21-42 post-ALI.

377 Within the bovine AECM, the major cell types present in the bronchial epithelium (ciliated-,  
378 goblet- and basal cells) were replicated in a pseudostratified morphology comparable to *ex*  
379 *vivo* tissue (Fig 2B). The epithelium did not exhibit evidence of dedifferentiation of these  
380 cell-types over the six weeks of culture at an ALI; there was no reduction in either the



381 number of ciliated- or goblet cells by day 42 post-ALI (Figs 4 & 6). The model was further  
382 assessed for signs of degradation. There was no significant increase in the number of  
383 pyknotic cells or epithelial gaps between day 15 (at which the cell morphology had reached  
384 peak thickness) and day 42 post-ALI (S3 Fig; Ordinary one-way ANOVA). This suggests  
385 there was no observable increase in cell death in the AECM, either due to apoptosis or  
386 autophagy [50, 51] following extended periods of culturing. Importantly, this confirms that  
387 once fully-differentiated, the model was stable for extended periods. A single culture can  
388 therefore be utilised in experimentation for up to 21 days, making the bovine AECM suitable  
389 for long-term or concurrent infections or repeat exposure toxicology studies.

390 The formation of tight-junctions between cells creates a physiochemical barrier against  
391 inhaled substances and prevents the penetration of pathogens or chemicals into the interstitial  
392 compartment [1, 8, 52]. Infection with certain viruses or bacteria however can cause  
393 transient disruption of tight and adherens junctions [11, 47, 53], and as such their presence is  
394 an essential feature of AECM for modelling pathologies. The TEER is an important method  
395 for assessing the formation of junctional complexes between cells [54]. In our model, once  
396 confluency was reached, the TEER of the culture rapidly increased (Fig 3C), suggestive of  
397 the formation of junctional complexes. The TEER peaked after approximately five days of  
398 submerged culturing, and this coincided with the formation of barrier function within our  
399 model. There was variation between animals in the peak value of TEER. Once an ALI was  
400 established, TEER decreased and stabilised at  $\sim 150\text{-}300 \Omega \times \text{cm}^2$  by day 9 post-ALI. There  
401 was no subsequent decrease in TEER up to day 42 post-ALI. This trend in TEER replicated  
402 the pattern exhibited in cultures derived from other animals [25, 44, 55], however TEER of  
403 other AECMs have been shown to stabilised at the peak [32]. This variation in TEER over  
404 the course of culturing was not reflected in the presence of tight-junctional protein ZO-1,  
405 which was maintained at a stable level throughout the time-course. ZO-1 localised towards

406 the cell-cell borders at all time-points (Fig 3A; S4 Fig), suggesting the presence of tight-  
407 junctions in the model both during submerged and ALI growth. As expected, the tight-  
408 junctions localised at the subapical region [8]. Using TEM, the structure of both desmosomes  
409 and adherens junctions of the bovine AECM were also observed, and was highly  
410 representative of *ex vivo* junctional complexes, even at the end point of the time-course (Fig  
411 3B). This evidence suggests our model possesses stable junctional complexes, allowing the  
412 effect of disruption of these barriers following challenge from either pathogens or toxin to be  
413 defined.

414 A highly ciliated apical surface is one of the hallmarks of the respiratory epithelium. Ciliated  
415 cells work in conjunction with mucus production to ensure removal of invading pathogens  
416 and inhaled particles through the process known as mucociliary clearance [56]. This occurs  
417 through a system which entraps inhaled objects in globules of mucus which are subsequently  
418 swept from the respiratory epithelium by the coordinated movement of cilia [6]. This  
419 mechanism is the first line of defence of the respiratory epithelium, and as such its presence  
420 is a vital component of AECMs [57]. Cilia formation was detected and quantified in BBECs  
421 using immunofluorescence microscopy and in histological sections (Fig 4D and E). Cilia  
422 were present in our model from as early as day 6 post-ALI, sooner than previous models have  
423 reported [31, 32]. Ciliated cells significantly increased in abundance by day 21 post-ALI, at  
424 which point the majority of the apical aspect of the culture was composed of ciliated cells.  
425 This increase in the number of ciliated cells following culturing for several weeks at ALI has  
426 similarly been observed in human AECMs [31, 32, 58]. There was no variation in the  
427 population of ciliated cells at day 42 post-ALI (Fig 4D and E). The ultrastructure of ciliated  
428 cells was further studied using SEM and TEM (Fig 5). The cilia present in the model were of  
429 correct morphology and comparable to ciliated cells present in *ex vivo* tissue, both in the  
430 structure of the basal bodies (Fig 5B) and 9 + 2 axoneme (Fig 5C). The length and density of

431 the cilia also appears comparable (Fig 5A). Using light microscopy, it has been shown that  
432 cilia are capable of actively beating. Using microspheres, we have shown that this beating is  
433 in a co-ordinated fashion, demonstrating active mucociliary clearance on the apical aspect  
434 (data not shown).

435 The presence of mucus, secreted by goblet cells onto the apical surface, is typical of the  
436 airway epithelium [59]. Mucins ensnare invading particles, which are subsequently removed  
437 from the respiratory tract through mucociliary clearance [60]. Evidence of jacalin-labelling  
438 indicative of Muc5AC-positive goblet cells could be observed throughout the culturing of the  
439 BBECs, including during submerged culture (Fig 6A & S7 Fig) [28]. Mucus secretions from  
440 ALI-grown AECM have been confirmed to be highly representative to *in vivo* secretions [61],  
441 suggesting our model was capable of accurately replicating the mucosal phenotype of the  
442 bovine respiratory tract. The release of mucus at the apical surface was observed using SEM  
443 (Fig 6C). The presence of goblet cells actively extruding mucus into the apical compartment  
444 could be identified in the model between day 15-42 post-ALI (Fig 6C [iii]). Smaller globules  
445 of mucus were also present entrapped in cilia (Fig 6C [i]). This suggests that actively  
446 excreted mucus was only present in differentiated cultures.

447 Progenitor basal cells were identified in the model using the marker p63 [62]. At all time-  
448 points examined, basal cells could be seen present in the epithelium, forming a continuous  
449 row along the basal aspect (S3 Fig). This distribution reflected *ex vivo* tissue, in which a row  
450 of basal cells forms, attached to the basement membrane (Fig 2B). The number of basal cells  
451 remained constant, regardless of the differentiation state of the epithelium, as to be expected  
452 [63]. Basal cells act to repair and regenerate the epithelium following damage [64]. In our  
453 bovine AECM, we have been able to show regeneration of our model following injury using  
454 a scratch assay (data not shown). This suggests basal cells are capable of repairing the  
455 epithelium following damage to the bovine AECM.

456 Despite the high degree of similarity between the bovine respiratory tract epithelia and  
457 differentiated BBEC cultures, there were several differences. The BBEC cultures were  
458 consistently thinner than the epithelium of bovine bronchi, at both the distal and proximal  
459 positions (S1 Fig). Similarly, the lawn of cilia produced by the model had a lower degree of  
460 coverage in comparison to *ex vivo* tissue (S6 Fig). Variation between ALI cultures and their  
461 source tissue has also previously been reported in human AECMs [28]. This may be due to  
462 the BBEC cultures not reaching full differentiation as achieved *in vivo*, or alternatively due to  
463 a higher number of cells differentiating into goblet cells as opposed to ciliated cells in the  
464 model. This may be due to the process of de-differentiation and re-differentiation that has to  
465 occur during the culturing of the airway epithelial cells *in vitro*.

466 In this study we have fully characterised a differentiated AECM derived from bronchial  
467 epithelial cells isolated from cattle. This model was shown to be highly representative of the  
468 *ex vivo* epithelium from which the cell were derived. The degree of differentiation of the  
469 model was determined at three day intervals over a six-week period. The model was shown  
470 to be fully differentiated between day 21-42 post-ALI, providing a three week window during  
471 which the model is suitable for experimentation. The bovine AECM contained the major  
472 epithelial cell types of the bronchial epithelium (ciliated-, goblet- and basal cells) in a  
473 columnar, pseudostratified epithelium which was highly reflective of the *in vivo* epithelia.  
474 The hallmark defences of the respiratory tract, specifically barrier function and mucociliary  
475 clearance, were present, ensuring the model is an excellent mimic of the respiratory  
476 microenvironment. Use of BBECs provides a lost-cost, easily obtainable alternative to  
477 human AECM. The model is highly stable for extended periods of culturing and displays  
478 limited inter-donor variability. As such the bovine AECM described provides an excellent  
479 model of the bronchial epithelium for use in infection and toxicology experiments.

480

481 **Acknowledgements**

482 We thank Ms Margaret Mullin and Ms Lynne Stevenson (both University of Glasgow) for  
483 assistance with electron microscopy and histology, respectively.

## 484 **References**

- 485 1. Bals R, Hiemstra PS. Innate immunity in the lung: how epithelial cells fight against  
486 respiratory pathogens. *Eur Respir J*. 2004; 23: 327-33. doi: 10.1183/09031936.03.00098803.  
487 pmid: 14979512.
- 488 2. Parker D, Prince A. Innate immunity in the respiratory epithelium. *Am J Respir Cell*  
489 *Mol Biol*. 2011; 45: 189-201. doi: 10.1165/rcmb.2011-0011RT. pmid: 21330463.
- 490 3. Bartlett JA, Fischer AJ, McCray PB, Jr. Innate immune functions of the airway  
491 epithelium. *Contrib Microbiol*. 2008; 15: 147-63. doi: 10.1159/000136349. pmid: 18511860.
- 492 4. Martin TR, Frevert CW. Innate immunity in the lungs. *Proc Am Thorac Soc*. 2005; 2:  
493 403-11. doi: 10.1513/pats.200508-090JS. pmid: PMC2713330.
- 494 5. Wanner A, Salathe M, O'Riordan TG. Mucociliary clearance in the airways. *Am J*  
495 *Respir Crit Care Med*. 1996; 154: 1868-902. doi: 10.1164/ajrccm.154.6.8970383. pmid:  
496 8970383.
- 497 6. Knowles MR, Boucher RC. Mucus clearance as a primary innate defense mechanism  
498 for mammalian airways. *J Clin Invest*. 2002; 109: 571-7. doi: 10.1172/JCI15217. pmid:  
499 PMC150901.
- 500 7. Antunes MB, Cohen NA. Mucociliary clearance - a critical upper airway host defense  
501 mechanism and methods of assessment. *Curr Opin Allergy Clin Immunol*. 2007; 7: 5-10. doi:  
502 10.1097/ACI.0b013e3280114eef. pmid: 17218804.
- 503 8. Ganesan S, Comstock AT, Sajjan US. Barrier function of airway tract epithelium.  
504 *Tissue Barriers*. 2013; 1: e24997. doi: 10.4161/tisb.24997. pmid: 24665407.
- 505 9. Whitsett JA, Alenghat T. Respiratory epithelial cells orchestrate pulmonary innate  
506 immunity. *Nat Immunol*. 2015; 16: 27-35. doi: 10.1038/ni.3045.

- 507 10. Bosch AA, Biesbroek G, Trzcinski K, Sanders EA, Bogaert D. Viral and bacterial  
508 interactions in the upper respiratory tract. PLoS Pathog. 2013; 9: e1003057. doi:  
509 10.1371/journal.ppat.1003057. pmid: 23326226.
- 510 11. Sajjan U, Wang Q, Zhao Y, Gruenert DC, Hershenson MB. Rhinovirus disrupts the  
511 barrier function of polarized airway epithelial cells. Am J Respir Crit Care Med. 2008; 178:  
512 1271-81. doi: 10.1164/rccm.200801-136OC. pmid: 18787220.
- 513 12. Crosby LM, Waters CM. Epithelial repair mechanisms in the lung. Am J Physiol  
514 Lung Cell Mol Physiol. 2010; 298: L715-31. doi: 10.1152/ajplung.00361.2009. pmid:  
515 20363851.
- 516 13. Park K-S, Wells JM, Zorn AM, Wert SE, Laubach VE, Fernandez LG, et al.  
517 Transdifferentiation of ciliated cells during repair of the respiratory epithelium. Am J Respir  
518 Cell Mol Biol. 2006; 34: 151-7. doi: 10.1165/rcmb.2005-0332OC. pmid: PMC2644179.
- 519 14. Russell WMS, Burch RL. The principles of humane experimental technique London:  
520 Methuen; 1959.
- 521 15. Mathis C, Poussin C, Weisensee D, Gebel S, Hengstermann A, Sewer A, et al. Human  
522 bronchial epithelial cells exposed *in vitro* to cigarette smoke at the air-liquid interface  
523 resemble bronchial epithelium from human smokers. Am J Physiol Lung Cell Mol Physiol.  
524 2013; 304: L489-L503. pmid: 23355383.
- 525 16. Seagrave J, Dunaway S, McDonald JD, Mauderly JL, Hayden P, Stidley C. Responses  
526 of differentiated primary human lung epithelial cells to exposure to diesel exhaust at an air-  
527 liquid interface. Exp Lung Res. 2007; 33: 27-51. doi: 10.1080/01902140601113088. pmid:  
528 17364910.
- 529 17. Brandenberger C, Rothen-Rutishauser B, Mühlfeld C, Schmid O, Ferron GA, Maier  
530 KL, et al. Effects and uptake of gold nanoparticles deposited at the air-liquid interface of a

- 531 human epithelial airway model. *Toxicol Appl Pharmacol.* 2010; 242: 56-65. doi:  
532 10.1016/j.taap.2009.09.014. pmid: 19796648.
- 533 18. Krunkosky TM, Jordan JL, Chambers E, Krause DC. *Mycoplasma pneumoniae* host-  
534 pathogen studies in an air-liquid culture of differentiated human airway epithelial cells.  
535 *Microb Pathog.* 2007; 42: 98-103. doi: 10.1016/j.micpath.2006.11.003. pmid: 17261358.
- 536 19. Ketterer MR, Shao JQ, Hornick DB, Buscher B, Bandi VK, Apicella MA. Infection of  
537 primary human bronchial epithelial cells by *Haemophilus influenzae*: macropinocytosis as a  
538 mechanism of airway epithelial cell entry. *Infect Immun.* 1999; 67: 4161-70. pmid:  
539 10417188.
- 540 20. Matrosovich MN, Matrosovich TY, Gray T, Roberts NA, Klenk HD. Human and  
541 avian influenza viruses target different cell types in cultures of human airway epithelium.  
542 *Proc Natl Acad Sci U S A.* 2004; 101. doi: 10.1073/pnas.0308001101. pmid: 15070767.
- 543 21. Zhang L, Peeples ME, Boucher RC, Collins PL, Pickles RJ. Respiratory syncytial  
544 virus infection of human airway epithelial cells is polarized, specific to ciliated cells, and  
545 without obvious cytopathology. *J Virol.* 2002; 76: 5654-66. doi: 10.1128/jvi.76.11.5654-  
546 5666.2002. pmid: 11991994.
- 547 22. Kaartinen L, Nettesheim P, Adler KB, Randell SH. Rat tracheal epithelial cell  
548 differentiation *in vitro*. *In Vitro Cell Dev Biol Anim.* 1993; 29: 481-92. doi:  
549 10.1007/bf02639383. pmid: 7687243.
- 550 23. Gray TE, Guzman K, Davis CW, Abdullah LH, Nettesheim P. Mucociliary  
551 differentiation of serially passaged normal human tracheobronchial epithelial cells. *Am J*  
552 *Respir Cell Mol Biol.* 1996; 14: 104-12. doi: 10.1165/ajrcmb.14.1.8534481. pmid: 8534481.
- 553 24. Guzman K, Randell SH, Nettesheim P. Epidermal growth factor regulates expression  
554 of the mucous phenotype of rat tracheal epithelial cells. *Biochem Biophys Res Commun.*  
555 1995; 217: 412-8. doi: 10.1006/bbrc.1995.2792. pmid: 7503716.



- 556 25. Bateman AC, Karasin AI, Olsen CW. Differentiated swine airway epithelial cell  
557 cultures for the investigation of influenza A virus infection and replication. *Influenza Other*  
558 *Respir Viruses*. 2013; 7: 139-50. doi: 10.1111/j.1750-2659.2012.00371.x. pmid:  
559 PMC3443301.
- 560 26. Mao H, Wang Y, Yuan W, Wong LB. Ciliogenesis in cryopreserved mammalian  
561 tracheal epithelial cells cultured at the air-liquid interface. *Cryobiology*. 2009; 59: 250-7. doi:  
562 10.1016/j.cryobiol.2009.07.012. pmid: 19703437.
- 563 27. Yoon JH, Gray T, Guzman K, Koo JS, Nettesheim P. Regulation of the secretory  
564 phenotype of human airway epithelium by retinoic acid, triiodothyronine, and extracellular  
565 matrix. *Am J Respir Cell Mol Biol*. 1997; 16: 724-31. doi: 10.1165/ajrcmb.16.6.9191474.  
566 pmid: 9191474.
- 567 28. Davis AS, Chertow DS, Moyer JE, Suzich J, Sandouk A, Dorward DW, et al.  
568 Validation of normal human bronchial epithelial cells as a model for influenza A infections in  
569 human distal trachea. *J Histochem Cytochem*. 2015; 63: 312-28. doi:  
570 10.1369/0022155415570968. pmid: 25604814.
- 571 29. Ostrowski LE, Nettesheim P. Inhibition of ciliated cell differentiation by fluid  
572 submersion. *Exp Lung Res*. 1995; 21: 957-70. pmid: 8591796.
- 573 30. Griffith LG, Swartz MA. Capturing complex 3D tissue physiology *in vitro*. *Nat Rev*  
574 *Mol Cell Biol*. 2006; 7: 211-24. doi: 10.1038/nrm1858. pmid: 16496023.
- 575 31. Prince OA, Krunkosky TM, Krause DC. *In vitro* spatial and temporal analysis of  
576 *Mycoplasma pneumoniae* colonization of human airway epithelium. *Infect Immun*. 2014; 82:  
577 579-86. doi: 10.1128/IAI.01036-13. pmid: 24478073.
- 578 32. Prytherch Z, Job C, Marshall H, Oreffo V, Foster M, BeruBe K. Tissue-specific stem  
579 cell differentiation in an *in vitro* airway model. *Macromol Biosci*. 2011; 11: 1467-77. doi:  
580 10.1002/mabi.201100181. pmid: 21994115.

- 581 33. Berube K, Prytherch Z, Job C, Hughes T. Human primary bronchial lung cell  
582 constructs: the new respiratory models. *Toxicology*. 2010; 278: 311-8. doi:  
583 10.1016/j.tox.2010.04.004. pmid: 20403407.
- 584 34. Goris K, Uhlenbruck S, Schwegmann-Wessels C, Köhl W, Niedorf F, Stern M, et al.  
585 Differential sensitivity of differentiated epithelial cells to respiratory viruses reveals different  
586 viral strategies of host infection. *J Virol*. 2009; 83: 1962-8. doi: 10.1128/jvi.01271-08. pmid:  
587 19052091.
- 588 35. Wu NH, Yang W, Beineke A, Dijkman R, Matrosovich M, Baumgartner W, et al. The  
589 differentiated airway epithelium infected by influenza viruses maintains the barrier function  
590 despite a dramatic loss of ciliated cells. *Sci Rep*. 2016; 6: 39668. doi: 10.1038/srep39668.  
591 pmid: 28004801.
- 592 36. Kirchhoff J, Uhlenbruck S, Goris K, Keil GM, Herrler G. Three viruses of the bovine  
593 respiratory disease complex apply different strategies to initiate infection. *Vet Res*. 2014; 45:  
594 20. doi: 10.1186/1297-9716-45-20. pmid: 24548739.
- 595 37. Ma Y, Han F, Liang J, Yang J, Shi J, Xue J, et al. A species-specific activation of  
596 Toll-like receptor signaling in bovine and sheep bronchial epithelial cells triggered by  
597 Mycobacterial infections. *Mol Immunol*. 2016; 71: 23-33. doi:  
598 10.1016/j.molimm.2016.01.004. pmid: 26802731.
- 599 38. Kameyama S, Kondo M, Takeyama K, Nagai A. Air exposure causes oxidative stress  
600 in cultured bovine tracheal epithelial cells and produces a change in cellular glutathione  
601 systems. *Exp Lung Res*. 2003; 29: 567-83. doi: 10.1080/01902140390240113. pmid:  
602 14594656.
- 603 39. Kondo M, Finkbeiner WE, Widdicombe JH. Cultures of bovine tracheal epithelium  
604 with differentiated ultrastructure and ion transport. *In Vitro Cell Dev Biol*. 1993; 29a: 19-24.  
605 pmid: 8444742.

- 606 40. Kanoh S, Kondo M, Tamaoki J, Kobayashi H, Motoyoshi K, Nagai A. Differential  
607 regulations between adenosine triphosphate (ATP)- and uridine triphosphate-induced Cl-  
608 secretion in bovine tracheal epithelium. *Am J Respir Cell Mol Biol*. 2001; 25: 370-6. doi:  
609 10.1165/ajrcmb.25.3.4382. pmid: 11588016.
- 610 41. Jayaraman S, Song Y, Verkman AS. Airway surface liquid pH in well-differentiated  
611 airway epithelial cell cultures and mouse trachea. *Am J Physiol Cell Physiol*. 2001; 281:  
612 C1504-C11. pmid: 11600413.
- 613 42. Ocepek M, Pate M, Žolnir-Dovč M, Poljak M. Transmission of *Mycobacterium*  
614 *tuberculosis* from human to cattle. *J Clin Microbiol*. 2005; 43: 3555-7. doi:  
615 10.1128/JCM.43.7.3555-3557.2005. pmid: PMC1169140.
- 616 43. Taylor G. Animal models of respiratory syncytial virus infection. *Vaccine*. 2017; 35:  
617 469-80. doi: 10.1016/j.vaccine.2016.11.054. pmid: PMC5244256.
- 618 44. O'Boyle N, Sutherland E, Berry CC, Davies RL. Temporal dynamics of ovine airway  
619 epithelial cell differentiation at an air-liquid interface. *PLoS ONE*. 2017; 12: e0181583. doi:  
620 10.1371/journal.pone.0181583. pmid: PMC5529025.
- 621 45. Vermeer PD, Harson R, Einwalter LA, Moninger T, Zabner J. Interleukin-9 induces  
622 goblet cell hyperplasia during repair of human airway epithelia. *Am J Respir Cell Mol Biol*.  
623 2003; 28: 286-95. doi: 10.1165/rcmb.4887. pmid: 12594054.
- 624 46. Andrews PM. A scanning electron microscopic study of the extrapulmonary  
625 respiratory tract. *Am J Anat*. 1974; 139: 399-423. doi: 10.1002/aja.1001390308.
- 626 47. Plotkowski MC, de Bentzmann S, Pereira SH, Zahm JM, Bajolet-Laudinat O, Roger  
627 P, et al. *Pseudomonas aeruginosa* internalization by human epithelial respiratory cells  
628 depends on cell differentiation, polarity, and junctional complex integrity. *Am J Respir Cell*  
629 *Mol Biol*. 1999; 20: 880-90. doi: 10.1165/ajrcmb.20.5.3408. pmid: 10226058.

- 630 48. Lopez-Souza N, Dolganov G, Dubin R, Sachs LA, Sassina L, Sporer H, et al.  
631 Resistance of differentiated human airway epithelium to infection by rhinovirus. *Am J*  
632 *Physiol Lung Cell Mol Physiol*. 2004; 286: L373-L81. doi: 10.1152/ajplung.00300.2003.  
633 pmid: 14711802.
- 634 49. Ghio AJ, Dailey LA, Soukup JM, Stonehuerner J, Richards JH, Devlin RB. Growth of  
635 human bronchial epithelial cells at an air-liquid interface alters the response to particle  
636 exposure. *Part Fibre Toxicol*. 2013; 10: 25. doi: 10.1186/1743-8977-10-25. pmid: 23800224.
- 637 50. Fink SL, Cookson BT. Apoptosis, pyroptosis, and necrosis: mechanistic description  
638 of dead and dying eukaryotic cells. *Infect Immun*. 2005; 73: 1907-16. doi:  
639 10.1128/iai.73.4.1907-1916.2005. pmid: 15784530.
- 640 51. Viuff B, Tjørnehøj K, Larsen LE, Røntved CM, Uttenthal Å, Rønsholt L, et al.  
641 Replication and clearance of respiratory syncytial virus: apoptosis is an important pathway of  
642 virus clearance after experimental infection with bovine respiratory syncytial virus. *Am J*  
643 *Pathol*. 2002; 161: 2195-207. doi: 10.1016/S0002-9440(10)64496-3. pmid: 12466134.
- 644 52. Coyne CB, Gambling TM, Boucher RC, Carson JL, Johnson LG. Role of claudin  
645 interactions in airway tight junctional permeability. *Am J Physiol Lung Cell Mol Physiol*.  
646 2003; 285: L1166. doi: 10.1152/ajplung.00182.2003. pmid: 12909588.
- 647 53. Kim JY, Sajjan US, Krasan GP, LiPuma JJ. Disruption of tight junctions during  
648 traversal of the respiratory epithelium by *Burkholderia cenocepacia*. *Infect Immun*. 2005; 73:  
649 7107-12. doi: 10.1128/iai.73.11.7107-7112.2005. pmid: 16239504.
- 650 54. Srinivasan B, Kolli AR, Esch MB, Abaci HE, Shuler ML, Hickman JJ. TEER  
651 measurement techniques for *in vitro* barrier model systems. *J Lab Autom*. 2015; 20: 107-26.  
652 doi: 10.1177/2211068214561025. pmid: 25586998.
- 653 55. Abraham G, Zizzadoro C, Kacza J, Ellenberger C, Abs V, Franke J, et al. Growth and  
654 differentiation of primary and passaged equine bronchial epithelial cells under conventional

- 655 and air-liquid-interface culture conditions. BMC Vet Res. 2011; 7: 26. doi: 10.1186/1746-  
656 6148-7-26. pmid: PMC3117700.
- 657 56. Spassky N, Meunier A. The development and functions of multiciliated epithelia. Nat  
658 Rev Mol Cell Biol. 2017. doi: 10.1038/nrm.2017.21. pmid: 28400610.
- 659 57. Clark AB, Randell SH, Nettesheim P, Gray TE, Bagnell B, Ostrowski LE. Regulation  
660 of ciliated cell differentiation in cultures of rat tracheal epithelial cells. Am J Respir Cell Mol  
661 Biol. 1995; 12: 329-38. doi: 10.1165/ajrcmb.12.3.7873199. pmid: 7873199.
- 662 58. Gras D, Petit A, Charriot J, Knabe L, Alagha K, Gamez AS, et al. Epithelial ciliated  
663 beating cells essential for *ex vivo* ALI culture growth. BMC Pulm Med. 2017; 17: 80. doi:  
664 10.1186/s12890-017-0423-5.
- 665 59. Crystal RG, Randell SH, Engelhardt JF, Voynow J, Sunday ME. Airway epithelial  
666 cells. Proc Am Thorac Soc. 2008; 5: 772-7. doi: 10.1513/pats.200805-041HR. pmid:  
667 18757316.
- 668 60. Fahy JV, Dickey BF. Airway mucus function and dysfunction. N Engl J Med. 2010;  
669 363: 2233-47. doi: 10.1056/NEJMra0910061. pmid: PMC4048736.
- 670 61. Kesimer M, Kirkham S, Pickles RJ, Henderson AG, Alexis NE, DeMaria G, et al.  
671 Tracheobronchial air-liquid interface cell culture: a model for innate mucosal defense of the  
672 upper airways? Am J Physiol Lung Cell Mol Physiol. 2009; 296: L92-L100. doi:  
673 10.1152/ajplung.90388.2008. pmid: 18931053.
- 674 62. Yang A, Schweitzer R, Sun D, Kaghad M, Walker N, Bronson RT, et al. p63 is  
675 essential for regenerative proliferation in limb, craniofacial and epithelial development.  
676 Nature. 1999; 398: 714-8. doi: 10.1038/19539. pmid: 10227294.
- 677 63. Boers JE, Ambergen AW, Thunnissen FB. Number and proliferation of basal and  
678 parabasal cells in normal human airway epithelium. Am J Respir Crit Care Med. 1998; 157:  
679 2000-6. doi: 10.1164/ajrccm.157.6.9707011. pmid: 9620938.

680 64. Rock JR, Onaitis MW, Rawlins EL, Lu Y, Clark CP, Xue Y, et al. Basal cells as stem  
681 cells of the mouse trachea and human airway epithelium. Proc Natl Acad Sci U S A. 2009;  
682 106: 12771-5. doi: 10.1073/pnas.0906850106. pmid: 19625615.

683

684 **Figure 1. Histological assessment of the differentiation of BBEC cultures over time.**

685 BBEC cultures were grown for a stated number of days at an ALI before being fixed,  
686 paraffin-embedded and sections cut using standard histological techniques. Sections were  
687 subsequently deparaffinised and stained using (A) H&E stain and (B) immunohistochemistry  
688 with an anti-p63 antibody labelling the nuclei of basal cells. Representative images are  
689 shown of (i) day -3, (ii) day 12, (iii) day 21 and (iv) day 42 post-ALI (see S1 Fig).  
690 Quantitative analysis (using ImageJ) of histological sections of BBEC layers fixed at three  
691 day intervals ranging from day -3 pre-ALI to day 42 post-ALI (see S1 Fig), showing (C)  
692 epithelial thickness and (D) the number of cell layers composing the epithelium was  
693 performed. For each insert, three measurements were taken (left, centre and right) in each of  
694 five 400x fields of view distributed evenly across the sample; three inserts were analysed per  
695 time point and the data represents the mean +/- standard deviation from tissue derived from  
696 three different animals.

697 **Figure 2. Comparison of epithelial morphology and distribution of cell types between**

698 **differentiated BBECs and the bovine bronchial epithelium.** BBEC cultures were grown  
699 for 21 days at an ALI before being fixed, paraffin-embedded and sections cut using standard  
700 histological techniques; sample of *ex vivo* tissue were also taken from the donor animal.  
701 Sections were subsequently deparaffinised and stained using (A) H&E stain and (B)  
702 immunohistochemical stain for epithelial cell type markers ( $\beta$ -tubulin - red; Muc5AC - green;  
703 p63 - blue; nuclei - grey). Representative images are shown of (i) *ex vivo* bovine bronchial  
704 epithelium and (ii) differentiated BBECs 21 days post-ALI.

705 **Figure 3. Barrier function and tight-junction formation in BBEC cultures over time.**

706 BBEC cultures were grown for the stated number of days at an ALI before fixation. Tight-  
707 junction formation of the BBEC cultures was subsequently assessed using (A)  
708 immunofluorescence imaging of tight-junctions (ZO-1 - green; nuclei - blue). Representative

709 images are shown of (i) day -3, (ii) day 12 (iii), day 21 and (iv) day 42 post-ALI (see S4 Fig).  
710 Transmission electron micrographs in (B) display the presence of junctional complexes  
711 (arrowheads denote adherens junctions and desmosomes). Representative images are shown  
712 of (i) *ex vivo* bovine bronchial epithelium and (ii) differentiated BBECs 42 days post-ALI.  
713 Tight-junction integrity during the course of culturing was assessed by measuring the TEER  
714 of BBEC cultures. Nine inserts were analysed per growth condition and the data represents  
715 the mean +/- standard deviation from tissue derived from three different animals.

716 **Figure 4. Cilia formation in BBEC cultures over time.** BBEC cultures were grown for the  
717 stated number of days at an ALI before fixation. The BBEC cultures were subsequently  
718 processed to assess cilia formation using (A) immunofluorescence labelling of cilia ( $\beta$ -tubulin  
719 - green; F-actin - red; nuclei - blue), (B) examination by SEM (arrowheads denote ciliated  
720 cells) and in (C) H&E stained histological sections. Representative images are shown of (i)  
721 day 0, (ii) day 12, (iii) day 21 and (iv) day 42 post-ALI (see S1, S5 & S6 Fig). Quantitative  
722 analysis of cilia formation (using ImageJ) of BBEC cultures fixed at three day intervals  
723 ranging from day -3 pre-ALI to day 42 post-ALI using (D) fluorescence intensity  
724 thresholding of immunostained cultures (see S5 Fig) and (E) by counting the number of  
725 ciliated cells per field of view in H&E-stained sections (see S1 Fig). In (D), cilia formation  
726 was quantified by measuring the area above a fluorescence intensity threshold in ImageJ; for  
727 each insert, five regions evenly distributed across the sample were measured. In (E), for each  
728 insert, ciliated cells were counted in each of five 400x fields of view evenly distributed across  
729 the sample. For all of the above quantifications, three inserts were analysed per time point  
730 and the data represents the mean +/- standard deviation from tissue derived from three  
731 different animals.

732 **Figure 5. Electron microscopy of cilia formation in differentiated BBECs compared**  
733 **with bovine bronchial epithelium.** BBEC cultures were grown for 21 days at an ALI before



734 being fixed and processed for electron microscopy, a sample of *ex vivo* tissue were also taken  
735 from each donor animal. Images are shown of (A) scanning electron micrographs of apical  
736 surface, (B) transmission electron micrographs of cilium basal bodies (arrowheads denote  
737 basal bodies) and (C) transmission electron micrographs of 9 + 2 axoneme of cilia.  
738 Representative images are shown of (i) *ex vivo* bovine bronchial epithelium and (ii)  
739 differentiated BBECs 21 days post-ALI.

740 **Figure 6. Mucus production in BBEC cultures over time.** BBEC cultures were grown for  
741 the stated number of days at an ALI before fixation. The BBEC cultures were subsequently  
742 processed to assess mucus production using (A) immunofluorescence imaging of mucus  
743 formation (Muc5AC - green;  $\beta$ -tubulin - red; nuclei - blue). Representative images are shown  
744 of (i) day 0, (ii) day 12, (iii) day 21 and (iv) day 42 post-ALI (see S8 Fig). The presence of  
745 mucus on the apical surface was also imaged in (C) scanning electron micrographs of BBEC  
746 cultures grown at an ALI. Representative images are shown of (i) globules of mucus coating  
747 cilia (day 33 post-ALI), (ii) web of mucus coating the apical surface (day 36 post-ALI) and  
748 (iii) mucus extruded by a goblet cell (day 21 post-ALI).

749 **Figure 7. Electron microscopic assessment of the ultrastructure of BBEC cultures over**  
750 **time.** BBEC cultures were grown for the stated number of days at an ALI before fixation and  
751 processing for SEM. Scanning electron micrographs of cultures are shown of representative  
752 images of (A) the undifferentiated apical surface (day 0 post-ALI), (B) microvilli and  
753 microplicae on undifferentiated cells (day 0 post-ALI), (C) microvilli on differentiating cell  
754 (day 6 post-ALI), (D) an early ciliated cell (day 6 post-ALI), (E) the differentiated apical  
755 surface (day 18 post-ALI), (F) the differentiated apical surface (day 42 post-ALI), (G) the  
756 pseudostratified epithelium (day 18 post-ALI), (H) microvilli on ciliated cells (day 36 post-  
757 ALI) and (I) non-extruding goblet cells (day 21 post-ALI).

758 **Supplementary Figure Legends**

759 **Supplementary Figure 1. Histological assessment of epithelial morphology of BBEC**

760 **cultures over time.** BBEC cultures were grown for a stated number of days at an ALI before  
761 being fixed, paraffin-embedded and sections cut using standard histological techniques;  
762 sample of *ex vivo* tissue were also taken from each donor animal. Sections were subsequently  
763 deparaffinised and H&E stained.

764 **Supplementary Figure 2. Histological assessment of basal cell distribution in BBEC**

765 **cultures over time.** BBEC cultures were grown for a stated number of days at an ALI before  
766 being fixed, paraffin-embedded and sections cut using standard histological techniques;  
767 sample of *ex vivo* tissue were also taken from each donor animal. Sections were subsequently  
768 deparaffinised and immunohistochemistry labelling of basal cells was performed using an  
769 anti-p63 antibody (positively labelled cells display brown-labelled nuclei). For days -3 and 0  
770 the tissue layers were too thin to recover following antigen retrieval.

771 **Supplementary Figure 3. Assessment of deterioration in BBEC cultures over time from**

772 **histological sections.** BBEC cultures were grown for the stated number of days at an ALI  
773 before being fixed and paraffin-embedded using standard histological techniques. Sections  
774 were cut, deparaffinised and stained using H&E. Representative images in (A) are shown of  
775 (i) pyknotic cells (day 27 post-ALI) and (ii) epithelial gaps (day 33 post-ALI). Quantitative  
776 analysis (using ImageJ) of histological sections of BBEC layers fixed at three day intervals  
777 ranging from day -3 pre-ALI to day 42 post-ALI (see S1 Fig), showing (C) the number of  
778 pyknotic cells and (D) the number of epithelial gaps per field of view. For each insert, the  
779 numbers of pyknotic cells and epithelial gaps were counted in each of five 400x fields of  
780 view evenly distributed across the sample; three inserts were analysed per growth condition

781 and the data represents the mean +/- standard deviation from tissue derived from three  
782 different animals.

783 **Supplementary Figure 4. Tight junction formation in BBEC cultures over time assessed**  
784 **using immunofluorescence.** BBEC cultures were grown for the stated number of days at an  
785 ALI before fixation. Samples were subsequently immunofluorescently stained for tight  
786 junctions (ZO-1 - green; nuclei - blue).

787 **Supplementary Figure 5. Differentiation of ciliated cells in BBEC cultures over time**  
788 **assessed using immunofluorescence.** BBEC cultures were grown for the stated number of  
789 days at an ALI before fixation. Samples were subsequently immunofluorescently stained for  
790 cilia formation ( $\beta$ -tubulin - green; F-actin - red; nuclei - blue).

791 **Supplementary Figure 6. Differentiation of ciliated cells in BBEC cultures over time**  
792 **assessed using SEM.** BBEC cultures were grown for the stated number of days at an ALI  
793 before fixation and processing for SEM. *Ex vivo* tissues were dissected prior to cell  
794 extraction and were also fixed, processed and analysed by SEM.

795 **Supplementary Figure 7. Differentiation of goblet cells in BBEC cultures over time**  
796 **assessed using immunofluorescence.** BBEC cultures were grown for the stated number of  
797 days at an ALI before fixation. Samples were subsequently immunofluorescently stained for  
798 mucus-producing cells (Muc5AC - green;  $\beta$ -tubulin - red; nuclei - blue).

799

## Figure 1

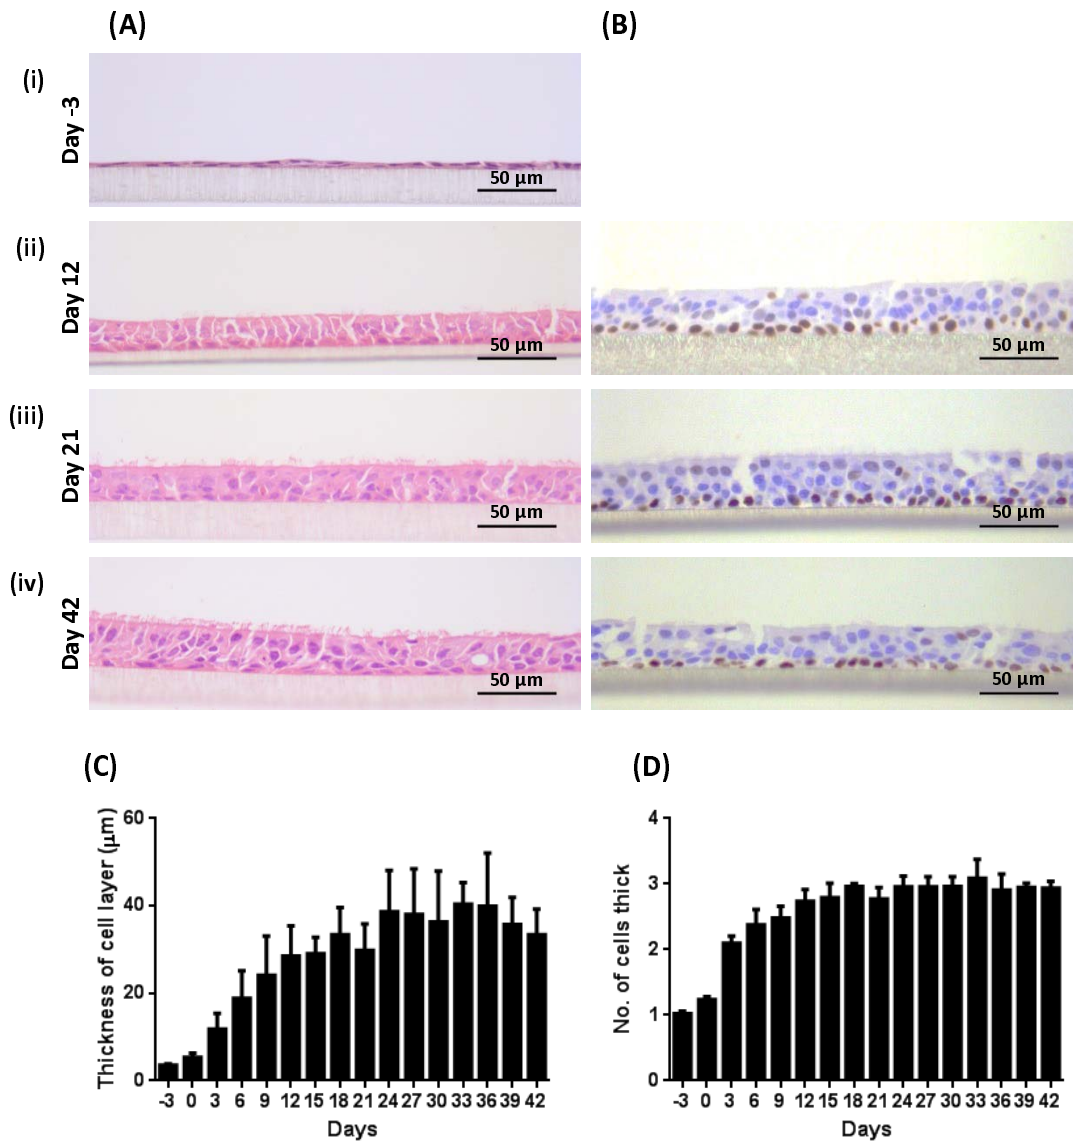

## Figure 2

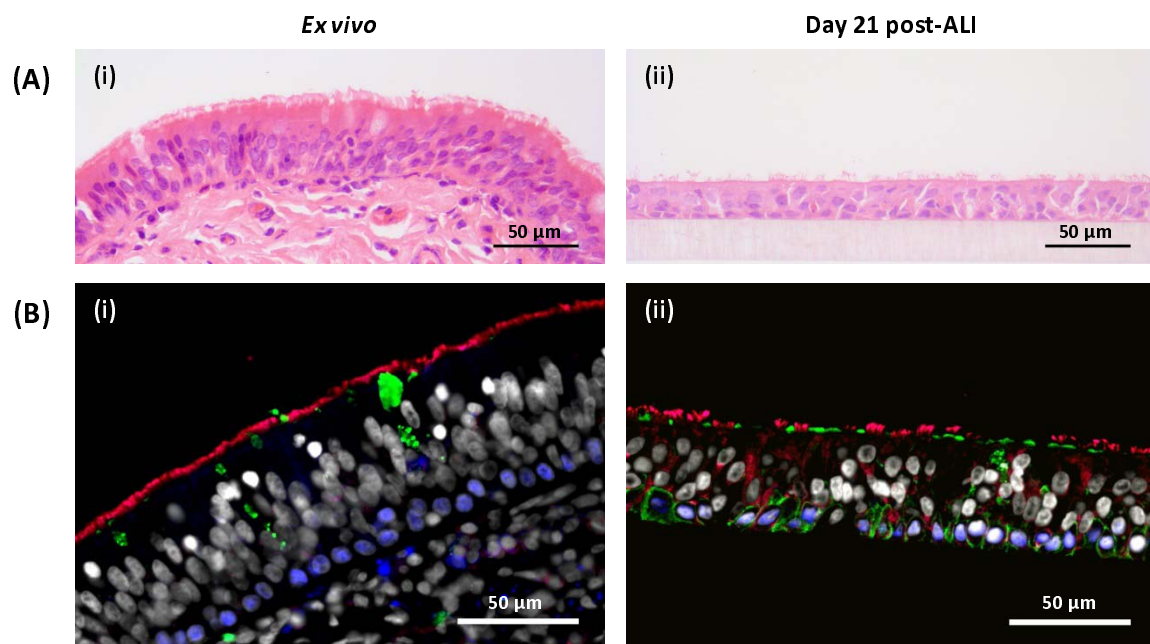

**Figure 3**

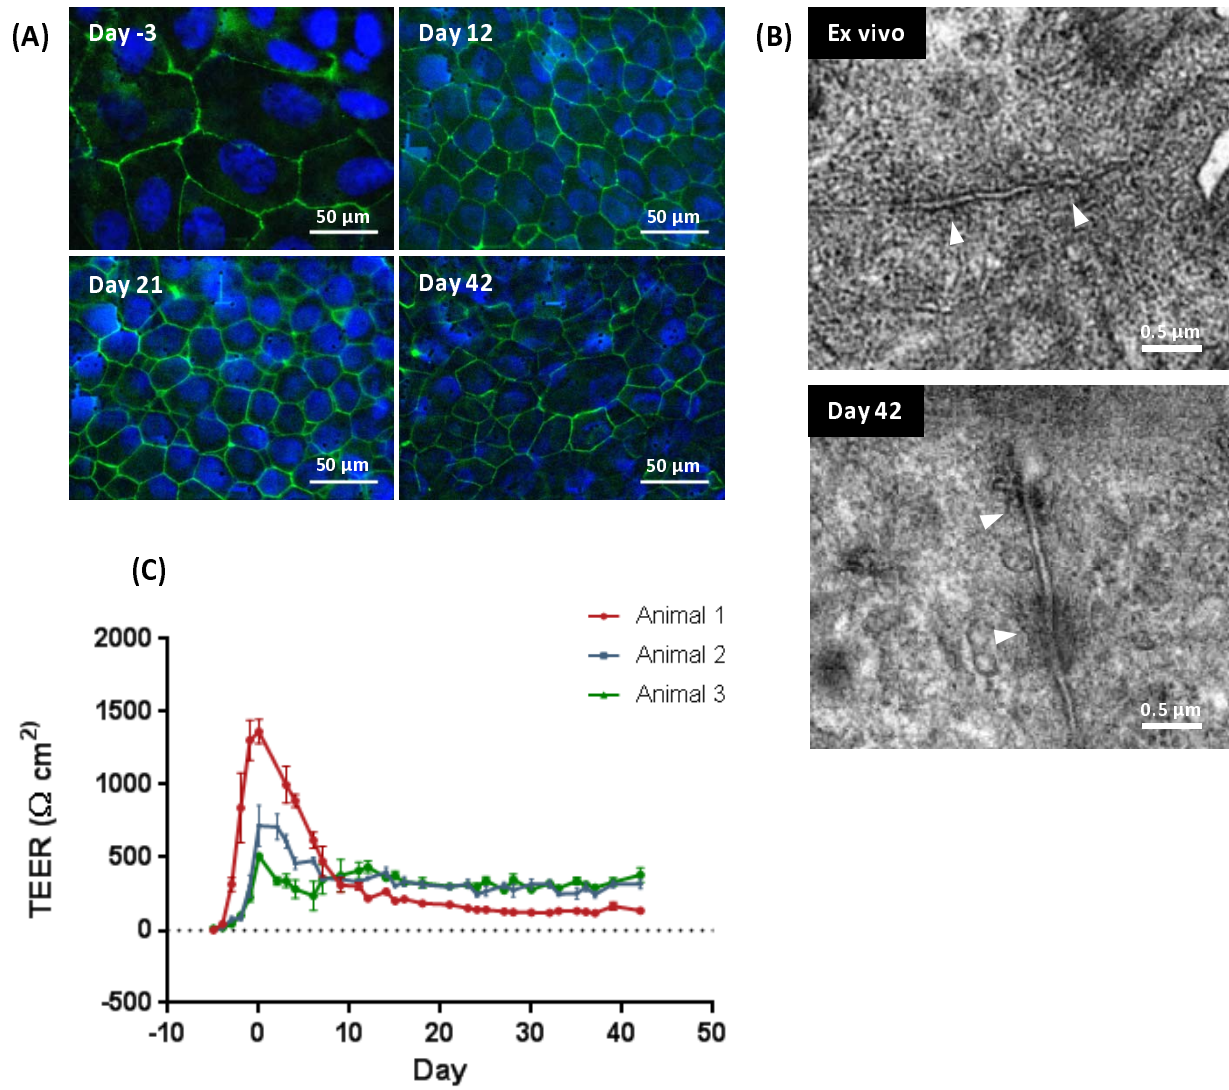

**Figure 4**

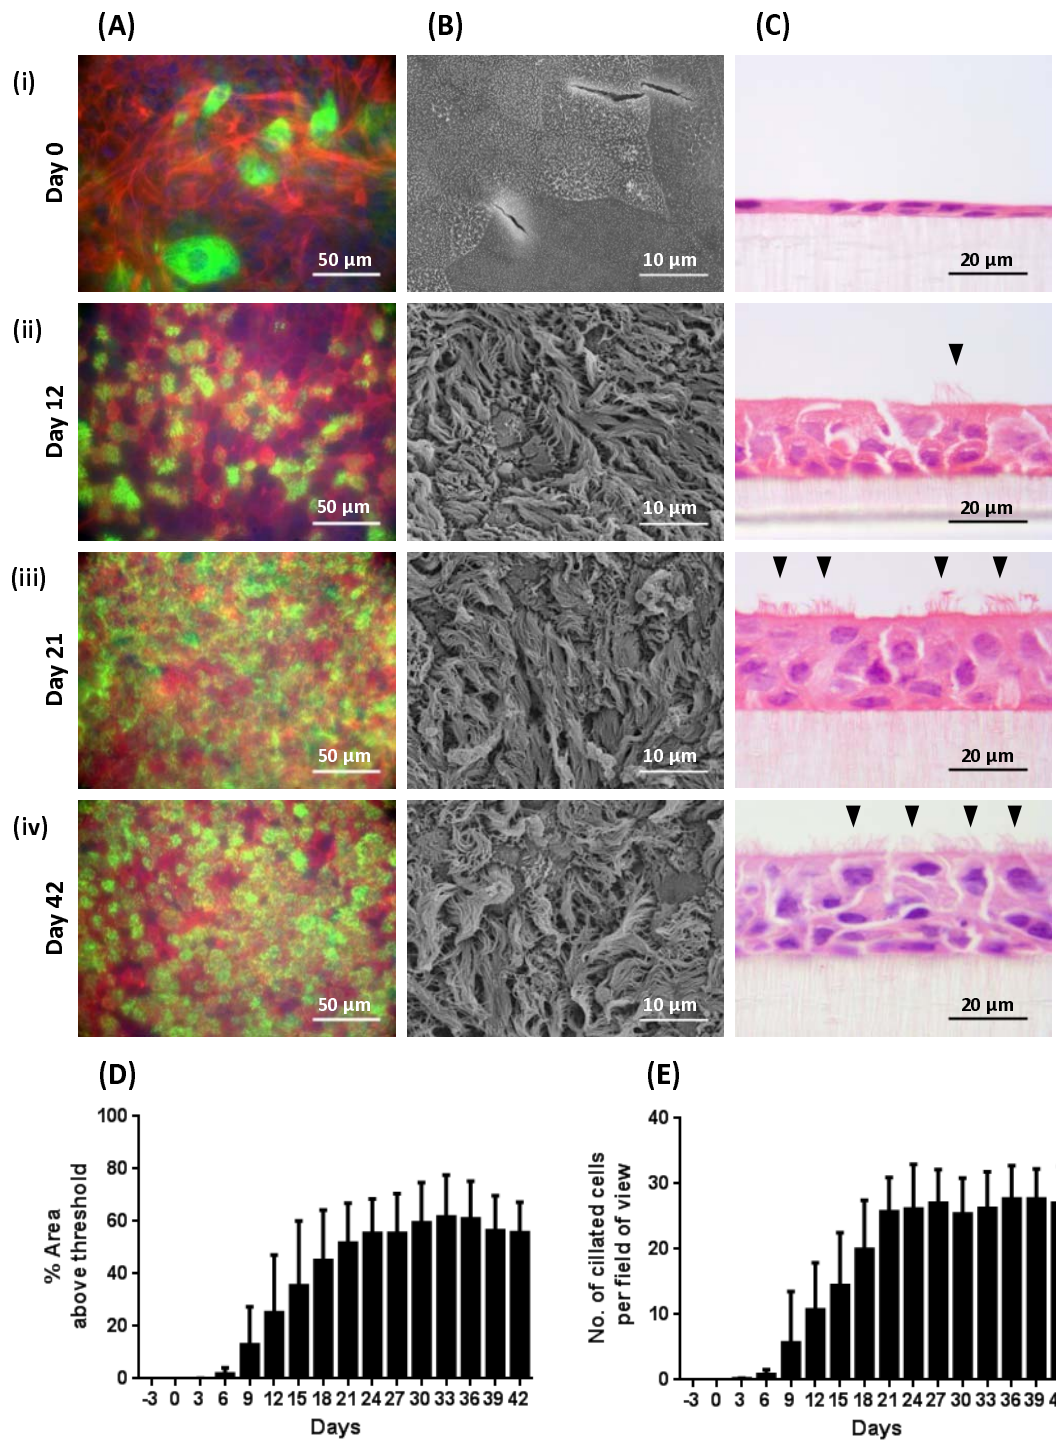

## Figure 5

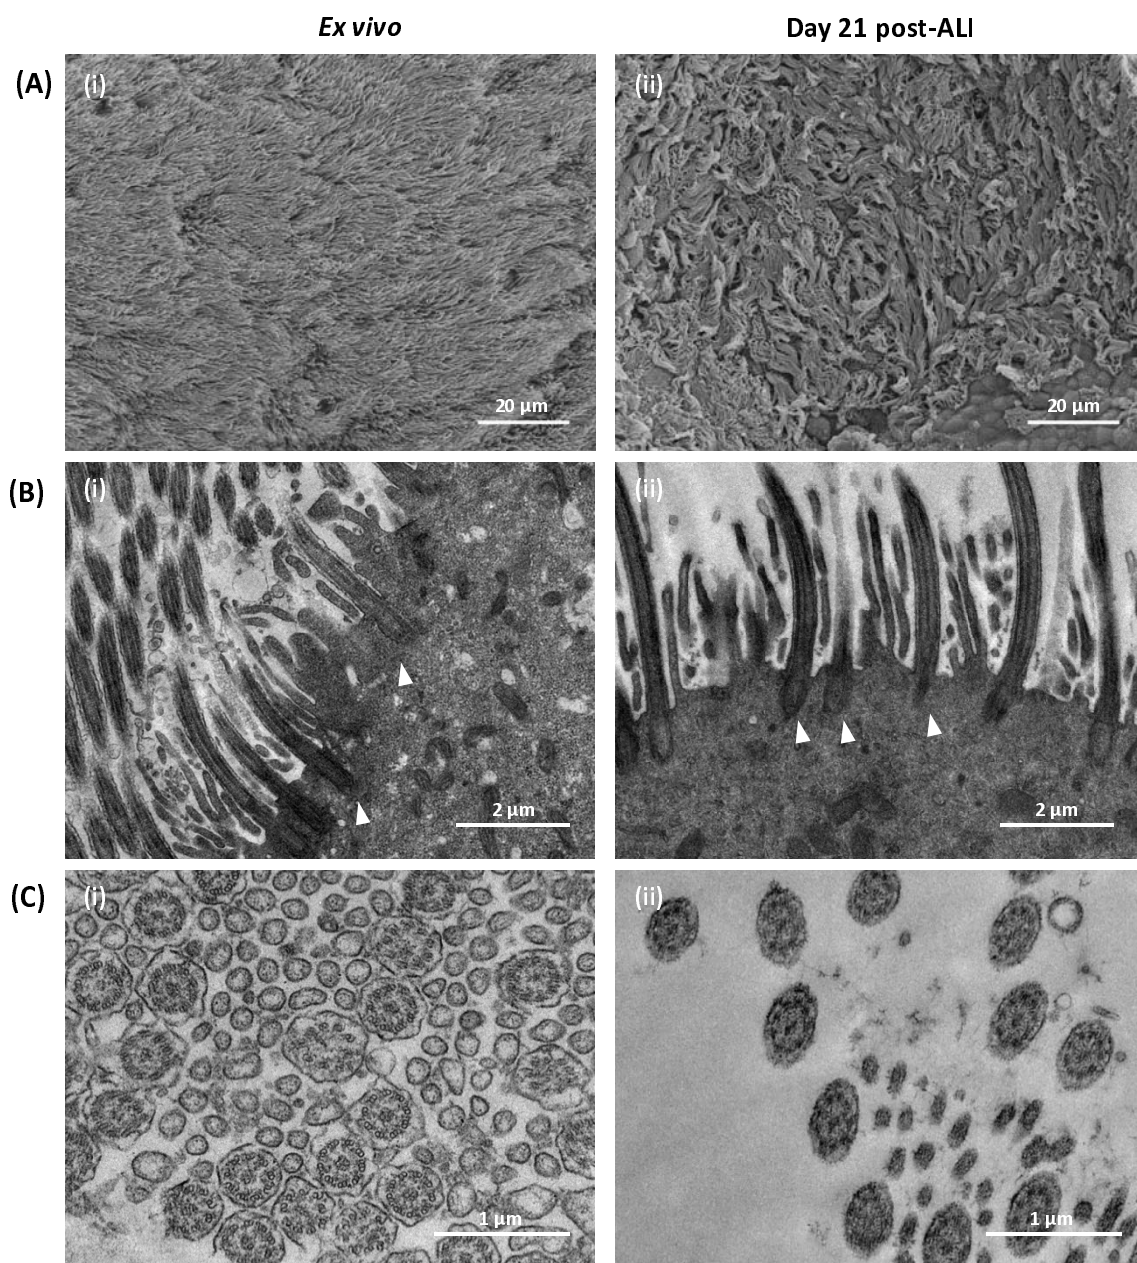



## Figure 6

(A)

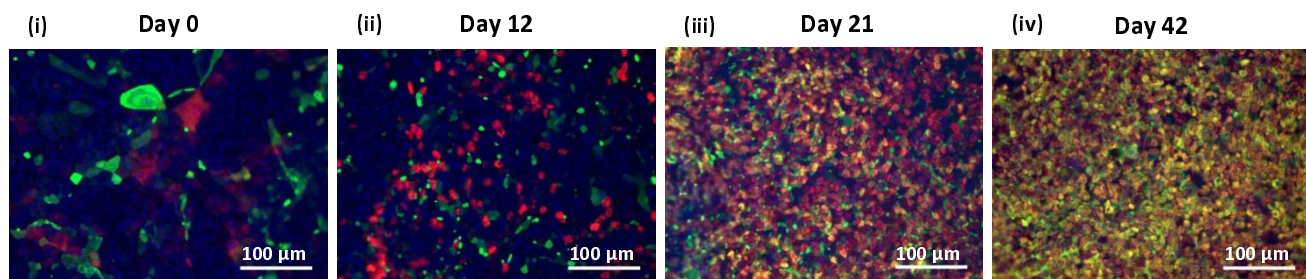

(B)

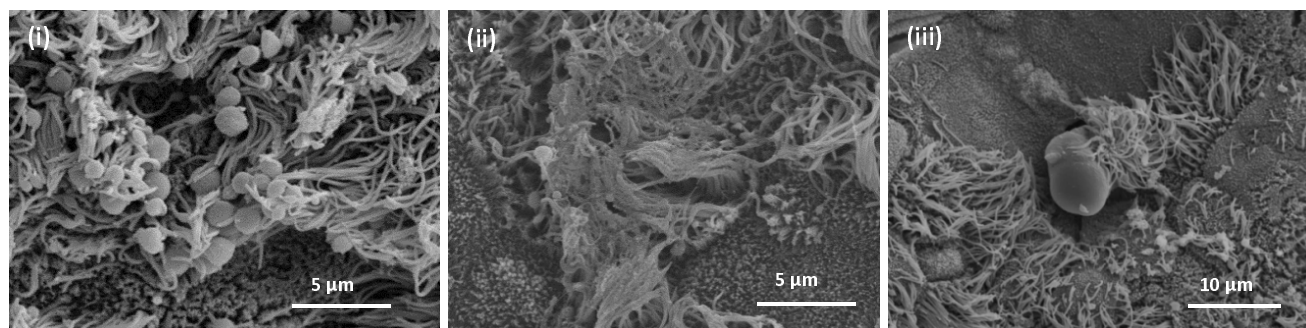

**Figure 7**

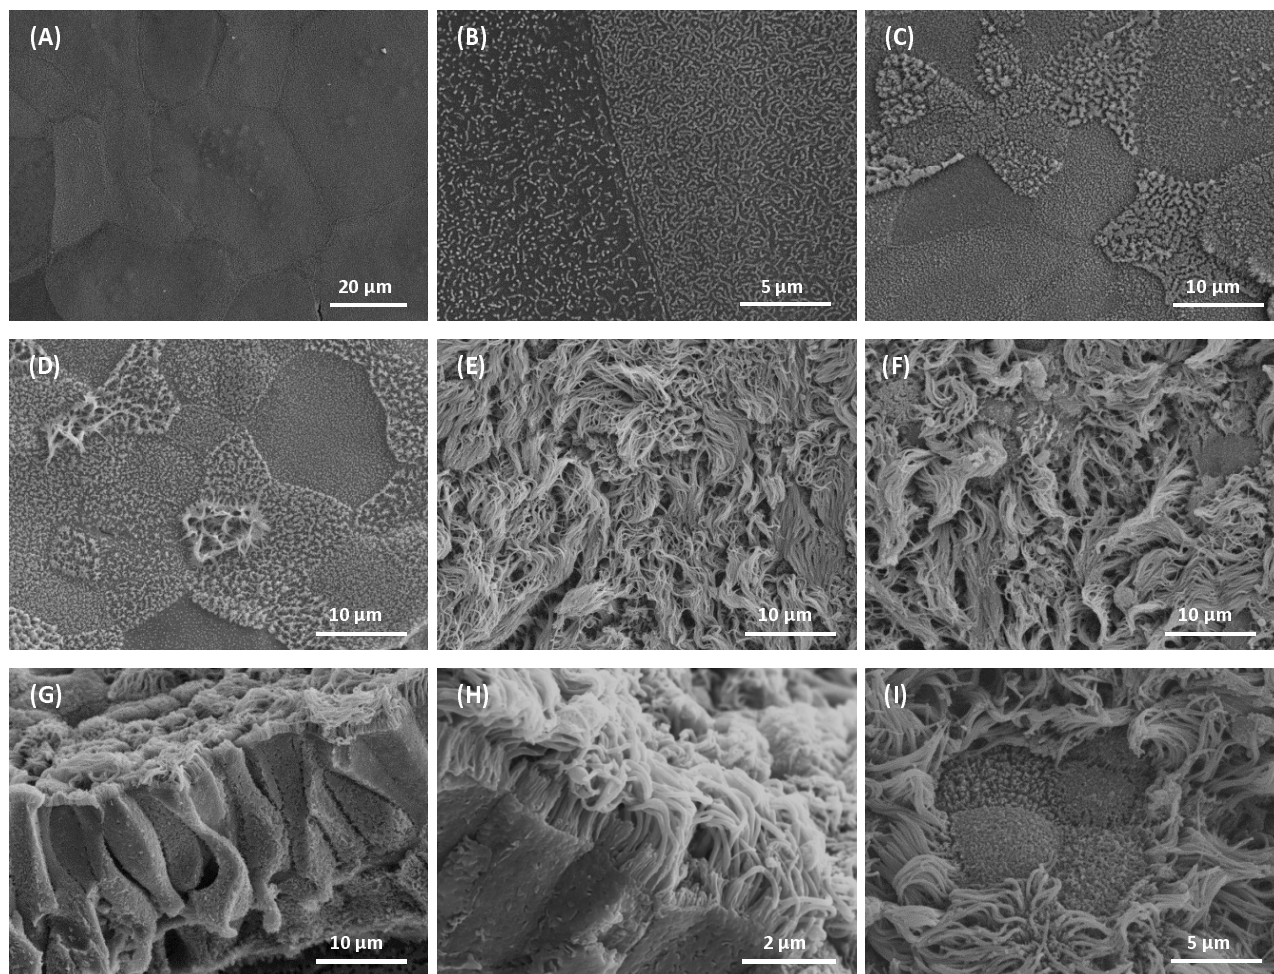



## Supplementary Figure 2

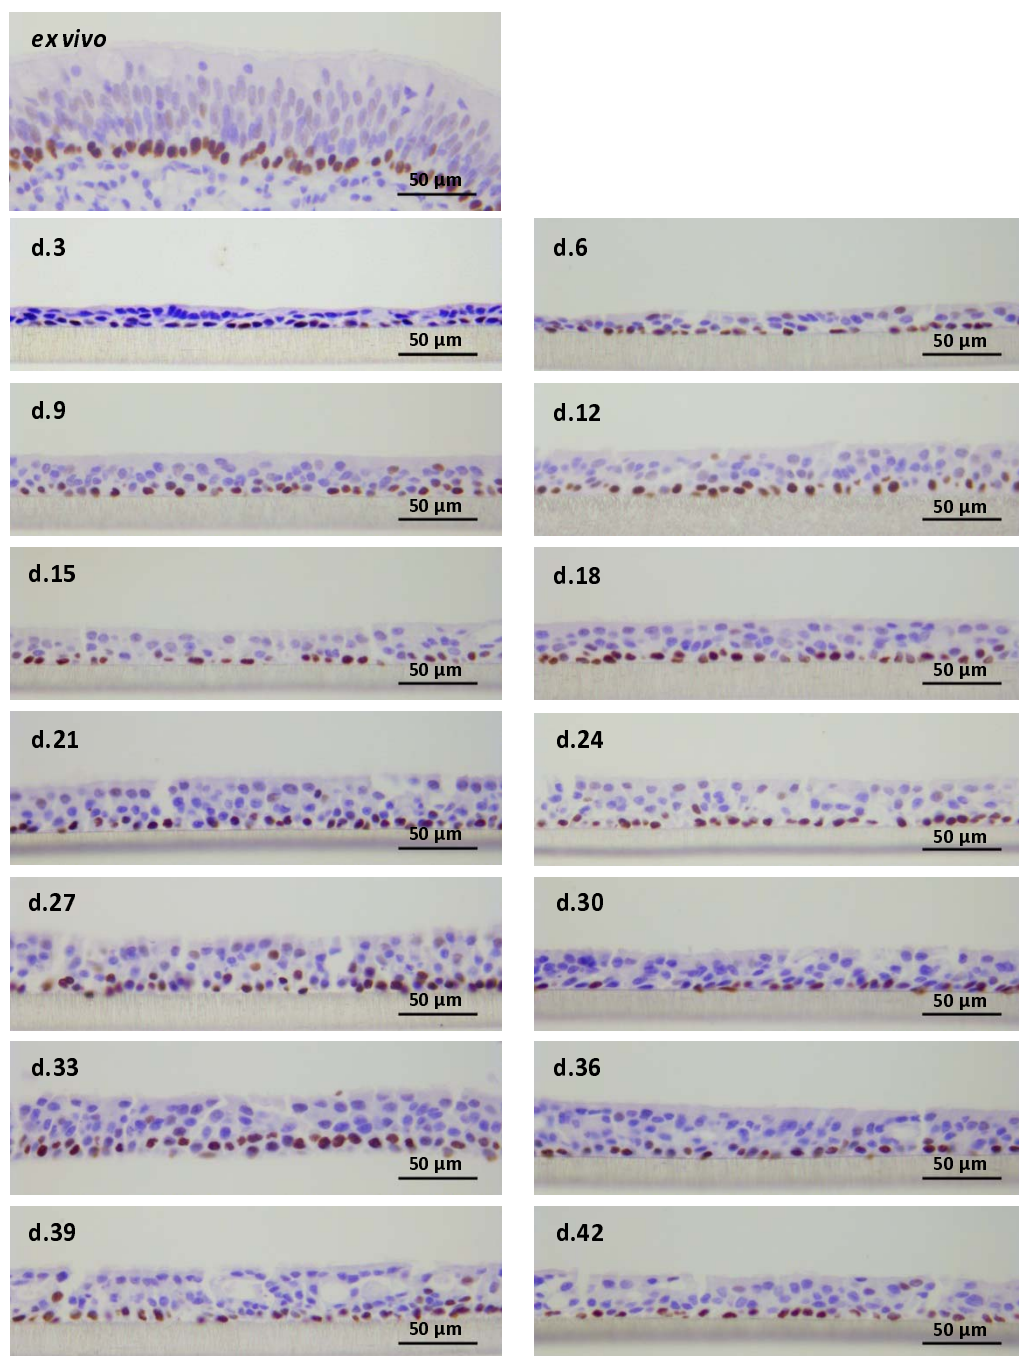

### Supplementary Figure 3

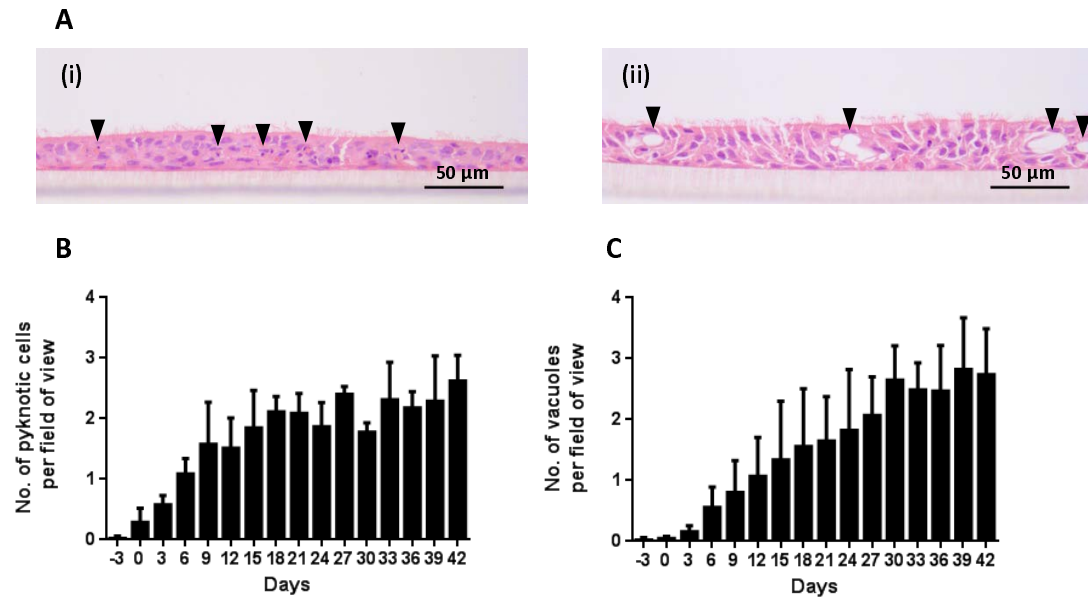

## Supplementary Figure 4

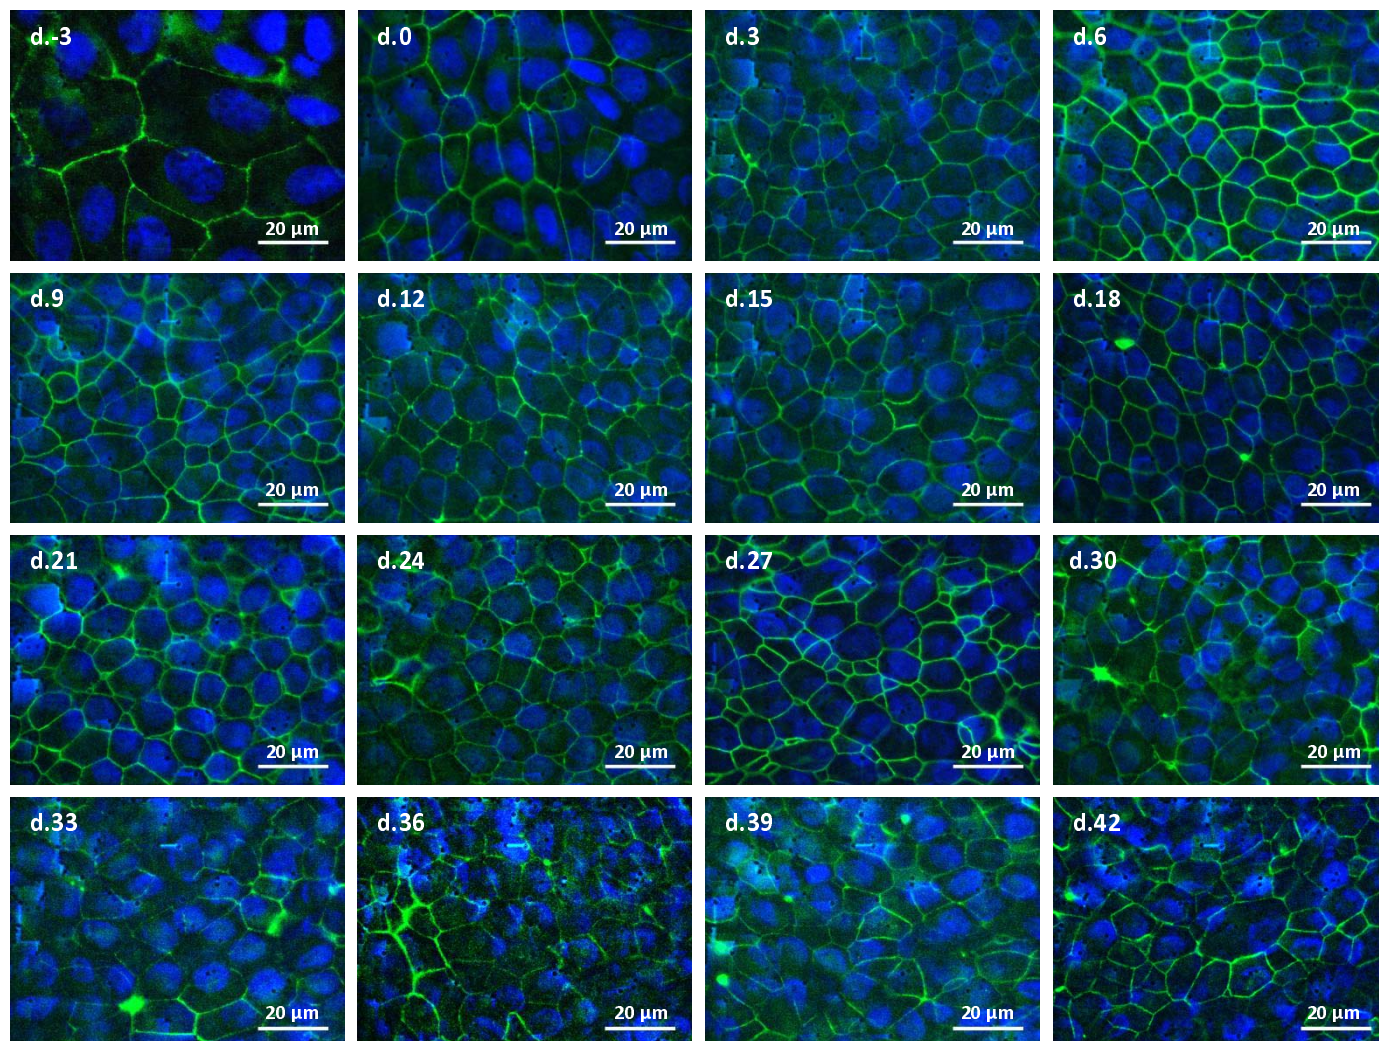

## Supplementary Figure 5

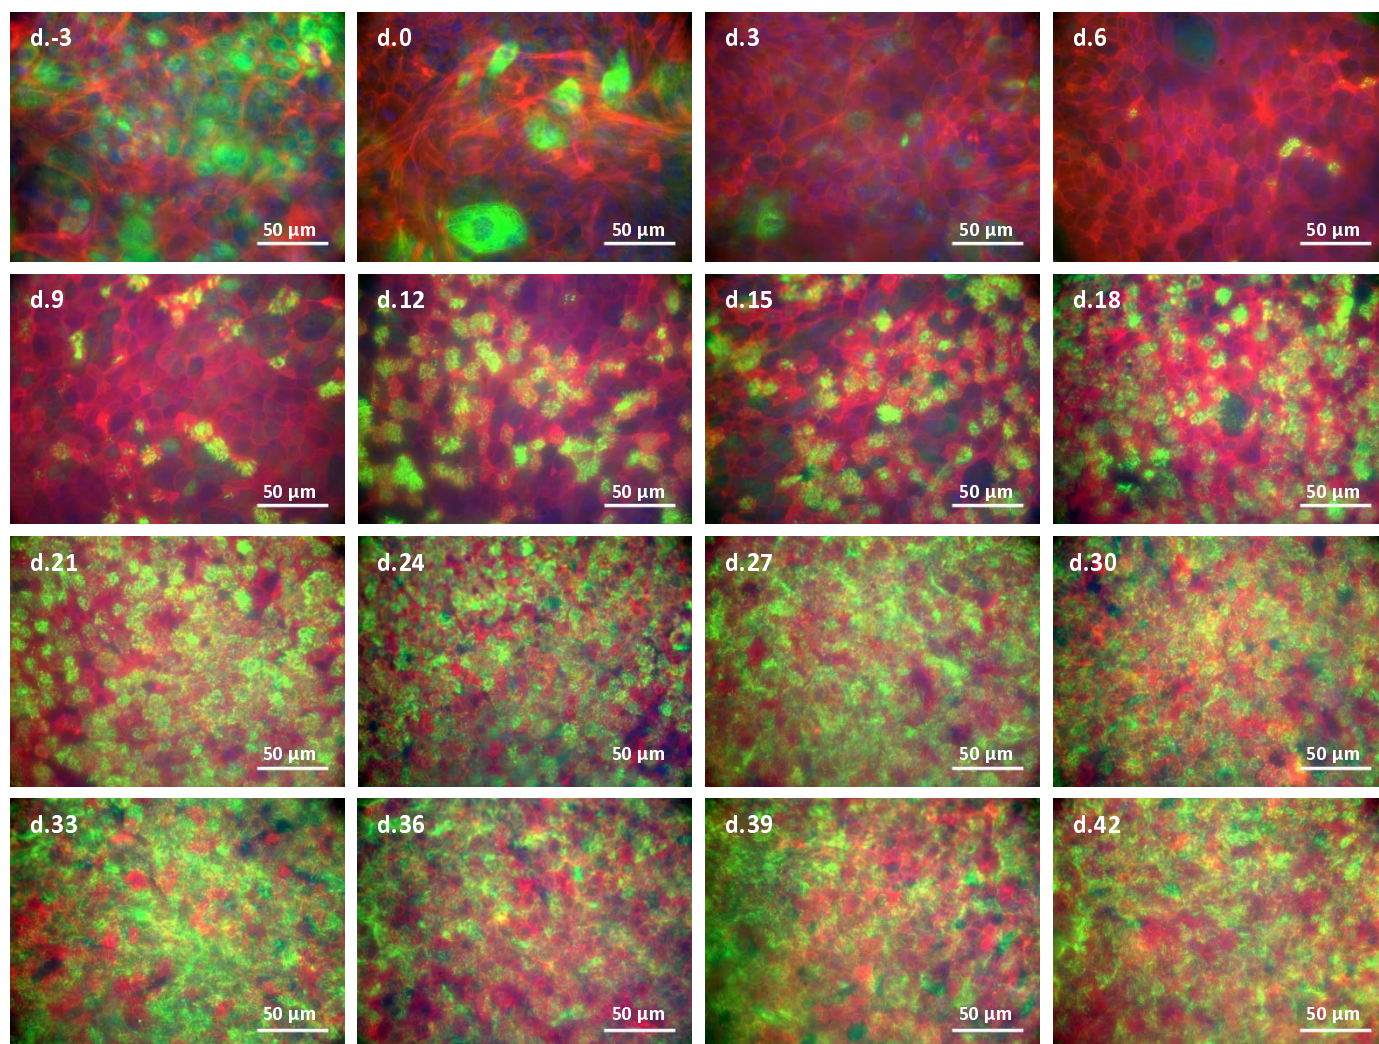

## Supplementary Figure 6

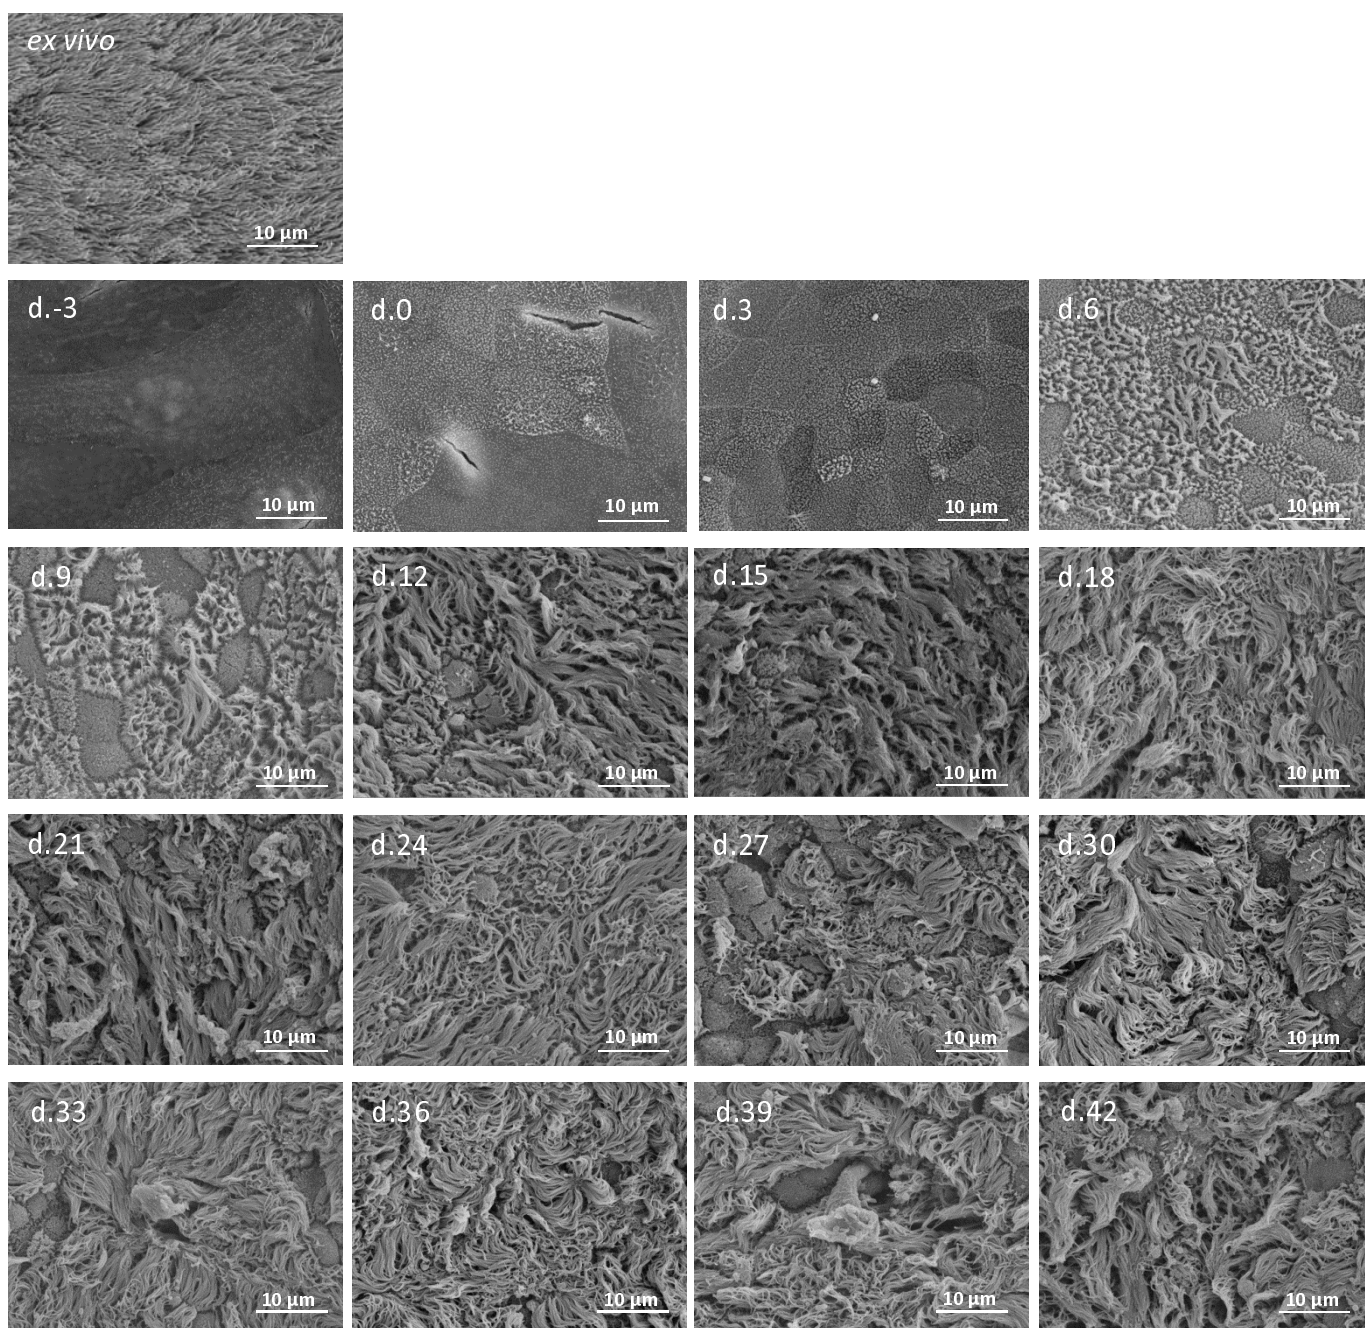



## Supplementary Figure 7

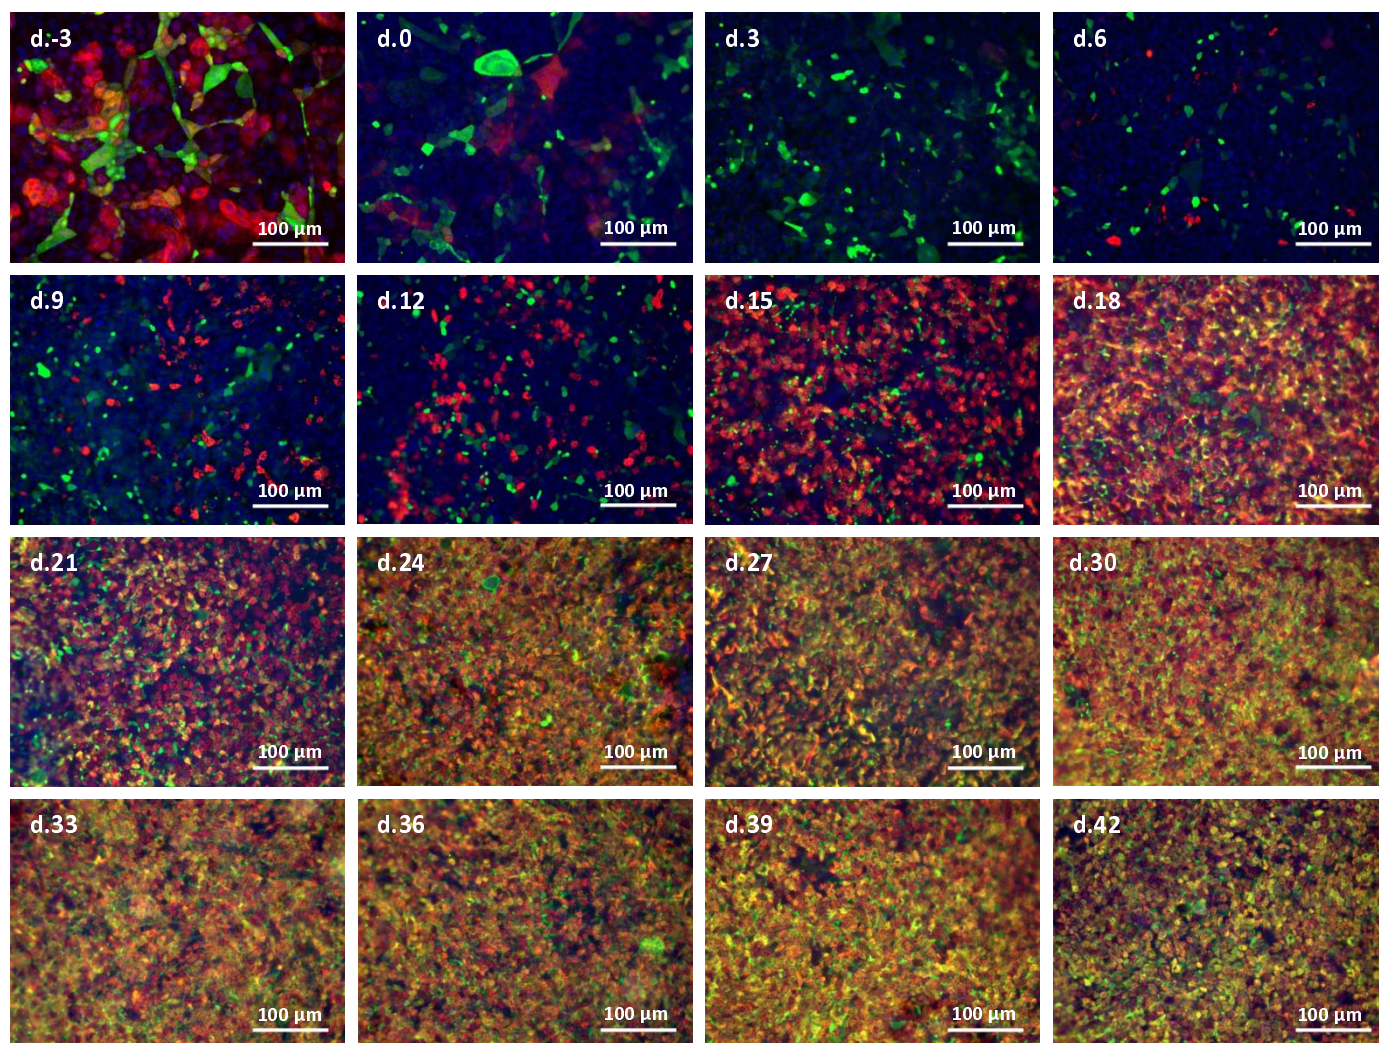

Source: http://biorxiv.org/content/10.1101/197814v1.full.pdf
